# Supplementary material for: A multiplex metabolomic approach for quality control of Spirulina supplement and its allied microalgae (Amphora & Chlorella) assisted by chemometrics and molecular networking
Source: PubMed Central journal article supplement (PMC10837195; doi:10.1038/s41598-024-53219-5), 2024-02-02
Supplement: 41598_2024_53219_MOESM1_ESM.pdf [file 41598_2024_53219_MOESM1_ESM.pdf]

**iA Multiplex Metabolomic Approach for Quality Control of Spirulina Supplement and its Allied Microalgae (Amphora & Chlorella) Assisted by Chemometrics and Molecular Networking**

**Nesrine Hegazi<sup>a</sup>, Amira R. Khattab<sup>b</sup>, Hamada H. Saad<sup>a</sup>, Bishoy Abib<sup>d</sup>, Mohamed A. Farag<sup>e\*</sup>**

<sup>a</sup>Department of Phytochemistry and Plant Systematics, National Research Centre, Dokki, Cairo 12622, Egypt

<sup>b</sup>Pharmacognosy Department, College of Pharmacy, Arab Academy for Science, Technology and Maritime Transport, Alexandria 1029, Egypt

<sup>c</sup>Chemistry department, American University in Cairo, Cairo, Egypt

<sup>d</sup>Pharmacognosy Department, College of Pharmacy, Cairo University, Kasr El Aini St., P.B. 11562, Cairo, Egypt

**\*Corresponding author: [Nm.hegazi@nrc.sci.eg](mailto:Nm.hegazi@nrc.sci.eg) (N. Hegazi), [Mohamed.farag@pharma.cu.edu](mailto:Mohamed.farag@pharma.cu.edu) (M.A. Farag).**

## Supplementary Data

**Supplementary Table S1: Metabolites identified in micro-algal samples (*Spirulina* (S1-S4), *Amphora* (AM.), and *Chlorella* (Chl.)) via UPLC-HRMS/MS analysis. -:absent, tr: traces, +: present, ++: abundant, +++: major.**

|                    | Compound name                     | RT    | M-H<br>(error in<br>ppm) | MS <sup>2</sup>                                   | M+H<br>(error in<br>ppm) | MS <sup>2</sup>                 | Formula                                        | S1 | S2 | S3 | S4 | Am. | Chl. | Reference |
|--------------------|-----------------------------------|-------|--------------------------|---------------------------------------------------|--------------------------|---------------------------------|------------------------------------------------|----|----|----|----|-----|------|-----------|
| <b>Fatty acids</b> |                                   |       |                          |                                                   |                          |                                 |                                                |    |    |    |    |     |      |           |
| 1.                 | Hydroxyoctanedioic acid           | 11.04 | 189.0770<br>(-0.7)       | 143, 127                                          |                          |                                 | C <sub>8</sub> H <sub>14</sub> O <sub>5</sub>  | -  | -  | tr | tr | ++  | tr   |           |
| 2.                 | Hydroxydecanedioic acid isomer I  | 13.55 | 217.1082<br>(-0.3)       | 157                                               |                          |                                 | C <sub>10</sub> H <sub>18</sub> O <sub>5</sub> | tr | tr | tr | tr | +++ | tr   |           |
| 3.                 | Hydroxydecanedioic acid isomer II | 14.53 | 217.1084<br>(-1.3)       | 199, 171, 155                                     |                          |                                 | C <sub>10</sub> H <sub>18</sub> O <sub>5</sub> | tr | tr | tr | tr | +++ | tr   |           |
| 4.                 | Tetrahydroxy-octadecadienoic acid | 15.29 | 343.2127<br>(-0.4)       | 325, 307, 299,<br>289, 271, 229,<br>211, 183, 171 |                          |                                 | C <sub>18</sub> H <sub>32</sub> O <sub>6</sub> | -  | -  | -  | tr | +++ | +    |           |
| 5.                 | Trihydroxyhexadecenoic acid       | 17.32 | 301.2018<br>(0.8)        | 283, 265., 201,<br>183, 143                       |                          |                                 | C <sub>16</sub> H <sub>30</sub> O <sub>5</sub> | -  | -  | -  | tr | +++ | tr   |           |
| 6.                 | Hydroxydodecandioic acid          | 17.62 | 245.1392<br>(1.0)        | 217, 199, 171,<br>155, 125                        |                          |                                 | C <sub>12</sub> H <sub>22</sub> O <sub>5</sub> | -  | -  | -  | -  | ++  | -    |           |
| 7.                 | Trihydroxyoctadecenoic acid       | 19.54 | 329.2336<br>(-0.7)       | 229, 211, 171                                     |                          |                                 | C <sub>18</sub> H <sub>34</sub> O <sub>5</sub> | tr | tr | -  | tr | +++ | tr   |           |
| 8.                 | Oxo-octadecadienoic Acid isomer I | 19.63 |                          |                                                   | 295.2264<br>(1.2)        | 277, 259, 249,<br>241, 179,165, | C <sub>18</sub> H <sub>30</sub> O <sub>3</sub> | tr | +  | -  | +  | +++ | +    | GNPS      |

|     | Compound name                        | RT    | M-H<br>(error in<br>ppm) | MS <sup>2</sup>                         | M+H<br>(error in<br>ppm) | MS <sup>2</sup>                                                               | Formula                                        | S1 | S2 | S3 | S4 | Am. | ChI. | Reference |
|-----|--------------------------------------|-------|--------------------------|-----------------------------------------|--------------------------|-------------------------------------------------------------------------------|------------------------------------------------|----|----|----|----|-----|------|-----------|
|     |                                      |       |                          |                                         |                          | 151, 133, 125,<br>107, 95                                                     |                                                |    |    |    |    |     |      |           |
| 9.  | Dodecandioic acid                    | 21.37 | 229.1444<br>(0.4)        | 211, 167, 130                           |                          |                                                                               | C <sub>12</sub> H <sub>22</sub> O <sub>4</sub> | tr | tr | tr | tr | +++ | +    |           |
| 10. | Oxo-octadecatrienoic acid            | 21.53 |                          |                                         | 293.2109<br>(0.9)        | 275, 245, 163,<br>151, 133, 119,<br>105, 95, 81, 67                           | C <sub>18</sub> H <sub>28</sub> O <sub>3</sub> | +  | +  | +  | ++ | +++ | +    | GNPS      |
| 11. | Hydroxy-oxo-<br>octadecadienoic acid | 21.54 |                          |                                         | 311.2213<br>(1.3)        | 293, 275, 245,<br>223, 198, 181,<br>163, 151, 133,<br>119, 107, 93,<br>81, 67 | C <sub>18</sub> H <sub>30</sub> O <sub>4</sub> | tr | +  | tr | +  | +++ | +    |           |
| 12. | Trihydroxyoctadecadienoic acid       | 21.55 | 327.2173<br>(1.1)        | 309, 291, 209,<br>197, 185, 171,<br>155 |                          |                                                                               | C <sub>18</sub> H <sub>32</sub> O <sub>5</sub> | tr | tr | tr | tr | +++ | tr   |           |
| 13. | Hexadecatetraenoic acid              | 21.79 |                          |                                         | 249.1849<br>(0.2)        | 232, 214, 189,<br>161, 147, 133,<br>119, 105, 93,<br>79, 67                   | C <sub>16</sub> H <sub>24</sub> O <sub>2</sub> | -  | -  | tr | tr | +++ | -    |           |
| 14. | Undecanedioic acid                   | 19.72 | 215.1291<br>(-0.8)       | 197, 153                                |                          |                                                                               | C <sub>11</sub> H <sub>20</sub> O <sub>4</sub> | tr | tr | tr | tr | +++ | +    | GNPS      |
| 15. | Octadecatrienoic acid,               | 23.46 |                          |                                         | 279.2317<br>(0.6)        | 263, 235, 189,<br>165, 149, 135,<br>121, 107, 95,<br>81, 67                   | C <sub>18</sub> H <sub>30</sub> O <sub>2</sub> | -  | tr | -  | ++ | +++ | -    |           |
| 16. | Octadecatetraenoic acid              | 24.00 |                          |                                         | 277.2161<br>(0.4)        | 260, 243, 171,<br>163, 147, 135,                                              | C <sub>18</sub> H <sub>28</sub> O <sub>2</sub> | tr | -  | -  | -  | +++ | -    | [1]       |

|     | Compound name                                                               | RT    | M-H<br>(error in<br>ppm) | MS <sup>2</sup>                                                               | M+H<br>(error in<br>ppm) | MS <sup>2</sup>                                                                    | Formula                                        | S1 | S2 | S3 | S4 | Am. | ChI. | Reference |
|-----|-----------------------------------------------------------------------------|-------|--------------------------|-------------------------------------------------------------------------------|--------------------------|------------------------------------------------------------------------------------|------------------------------------------------|----|----|----|----|-----|------|-----------|
|     |                                                                             |       |                          |                                                                               |                          | 121, 107, 93,<br>81, 67                                                            |                                                |    |    |    |    |     |      |           |
| 17. | Oxo-octadecadienoic<br>Acid isomer II                                       | 24.06 |                          |                                                                               | 295.2266<br>(0.6)        | 277, 259, 249,<br>241, 179, 165,<br>151, 133, 125,<br>107, 95                      | C <sub>18</sub> H <sub>30</sub> O <sub>3</sub> | tr | +  | +  | +  | +++ | -    | GNPS      |
| 18. | Hydroxy-<br>(hydroxymethyl) -<br>trimethyl-<br>tetradecadiene dioic<br>acid | 24.10 | 341.1971<br>(-0.5)       | 309, 291, 269,<br>195, 177, 165,<br>151, 135, 125,<br>109, 93, 83, 69         |                          |                                                                                    | C <sub>18</sub> H <sub>30</sub> O <sub>6</sub> | -  | tr | -  | -  | -   | -    |           |
| 19. | Trihydroxyoctadecatrie<br>noic acid                                         | 24.27 | 327.2178<br>(-0.4)       | 291, 273, 247,<br>221, 207, 197,<br>181, 163, 153,<br>137, 125                |                          |                                                                                    | C <sub>18</sub> H <sub>32</sub> O <sub>5</sub> | -  | tr | -  | tr | -   | tr   | [2]       |
| 20. | Oxohexadecenoic acid                                                        | 24.40 |                          |                                                                               | 291.1951<br>(1.1)        | 275, 257, 245,<br>229, 205, 191,<br>179, 161, 151,<br>133, 119, 105,<br>93, 81, 71 | C <sub>18</sub> H <sub>26</sub> O <sub>3</sub> | -  | +  | +  | tr | +   | tr   |           |
| 21. | Oxo-octadecatrienoic<br>acid                                                | 24.88 |                          |                                                                               | 293.2109<br>(0.7)        | 275, 247, 223,<br>205, 177, 163,<br>151, 137, 119,<br>107, 95, 81, 67              | C <sub>18</sub> H <sub>28</sub> O <sub>3</sub> | +  | +  | +  | +  | ++  | +    |           |
| 22. | Tetrahydroxy-<br>octadecadienoic acid                                       | 25.02 | 343.2129<br>(-0.7)       | 309, 291, 273,<br>247, 209, 197,<br>183, 151, 137,<br>125, 109, 95, 83,<br>69 |                          |                                                                                    | C <sub>18</sub> H <sub>32</sub> O <sub>6</sub> | -  | tr | tr | tr | +   | tr   | [3]       |

|                      | Compound name                          | RT    | M-H<br>(error in<br>ppm) | MS <sup>2</sup>                         | M+H<br>(error in<br>ppm) | MS <sup>2</sup>                                                | Formula                                              | S1 | S2 | S3 | S4  | Am. | ChI. | Reference |
|----------------------|----------------------------------------|-------|--------------------------|-----------------------------------------|--------------------------|----------------------------------------------------------------|------------------------------------------------------|----|----|----|-----|-----|------|-----------|
| 23.                  | Oxo-octadecadienoic<br>Acid isomer III | 26.92 |                          |                                         | 295.2267<br>(0.4)        | 277, 259, 249,<br>241, 179, 165,<br>151, 133, 125,<br>107, 95, | C <sub>18</sub> H <sub>30</sub> O <sub>3</sub>       | tr | +  | -  | +   | +++ | +    | GNPS      |
| 24.                  | Dioxo-octadecadienoic<br>acid          | 27.86 | 307.1915<br>(0.1)        | 289, 245, 209,<br>185, 165, 153,<br>113 |                          |                                                                | C <sub>18</sub> H <sub>28</sub> O <sub>4</sub>       | -  | +  | +  | +   | +   | +    | [4]       |
| 25.                  | Oxohexadecanoic acid                   | 33.33 | 269.2123<br>(-0.2)       | 225                                     |                          |                                                                | C <sub>16</sub> H <sub>30</sub> O <sub>3</sub>       | tr | +  | tr | +   | +++ | +    |           |
| <b>Organic acid</b>  |                                        |       |                          |                                         |                          |                                                                |                                                      |    |    |    |     |     |      |           |
| 26.                  | Phenylvalerate                         | 16.99 |                          |                                         | 197.1175<br>(-1.3)       | 179, 161, 151,<br>133                                          | C <sub>11</sub> H <sub>14</sub> O <sub>2</sub>       | +  | +  | +  | +   | +   | +    |           |
| <b>Carotenoid</b>    |                                        |       |                          |                                         |                          |                                                                |                                                      |    |    |    |     |     |      |           |
| 27.                  | Oxo-apo- caroten-one                   | 17.74 |                          |                                         | 289.1804<br>(-1.9)       | 271, 242, 229,<br>212, 200, 184                                | C <sub>18</sub> H <sub>24</sub> O <sub>3</sub>       | ++ | +  | +  | +++ | -   | +    | [5]       |
| <b>Phospholipids</b> |                                        |       |                          |                                         |                          |                                                                |                                                      |    |    |    |     |     |      |           |
| 28.                  | Diocanoyl<br>phosphocholine            | 20.32 |                          |                                         | 510.3189<br>(0.2)        | 258, 184, 104,<br>86                                           | C <sub>24</sub> H <sub>49</sub> NO <sub>8</sub><br>P | tr | tr | tr | tr  | +   | +++  |           |
| 29.                  | Unknown<br>glycerophosphocholine       | 20.91 |                          |                                         | 536.3346<br>(0.2)        | 518, 500, 258,<br>184, 104                                     | C <sub>26</sub> H <sub>51</sub> NO <sub>8</sub><br>P | +  | +  | +  | +   | +   | +    |           |
| 30.                  | Unknown                                | 21.16 | 523.2665<br>(2.4)        | 295, 277, 267,<br>227, 195, 152         |                          |                                                                | C <sub>24</sub> H <sub>45</sub> O <sub>10</sub> P    | +  | +  | +  | +   | +   | +    |           |

|                          | Compound name                                                                  | RT    | M-H<br>(error in<br>ppm) | MS <sup>2</sup> | M+H<br>(error in<br>ppm) | MS <sup>2</sup>                                                       | Formula                                                           | S1 | S2 | S3  | S4 | Am. | ChI. | Reference |
|--------------------------|--------------------------------------------------------------------------------|-------|--------------------------|-----------------|--------------------------|-----------------------------------------------------------------------|-------------------------------------------------------------------|----|----|-----|----|-----|------|-----------|
| 31.                      | <i>O</i> -Ricinoleoyl- glycerophosphocholine                                   | 22.33 |                          |                 | 538.3503<br>(0.0)        | 520, 502, 337,<br>258, 184, 104                                       | C <sub>26</sub> H <sub>53</sub> NO <sub>8</sub><br>P <sup>+</sup> | tr | +  | trt | tr | +++ | +++  |           |
| 32.                      | Unknown<br>glycerophosphocholine                                               | 23.42 |                          |                 | 536.3344<br>(0.5)        | 184, 104                                                              | C <sub>26</sub> H <sub>51</sub> NO <sub>8</sub><br>P <sup>+</sup> | -  | -  | tr  | tr | ++  | +++  |           |
| 33.                      | <i>O</i> -Linoleoyl- <i>O</i> -stearoyl-<br>sn-glycero-phosphate<br>isomer I   | 31.67 | 699.4969<br>(0.2)        | 437, 279, 255   |                          |                                                                       | C <sub>39</sub> H <sub>73</sub> O <sub>8</sub> P                  | -  | -  | -   | +  | +   | +    | GNPS, [6] |
| 34.                      | <i>O</i> -Linoleoyl- <i>O</i> -stearoyl-<br>sn-glycero-phosphate<br>isomer II  | 31.98 | 699.497<br>(0.0)         | 437, 279, 255   |                          |                                                                       | C <sub>39</sub> H <sub>73</sub> O <sub>8</sub> P                  | -  | +  | -   | -  | -   | -    | GNPS, [6] |
| 35.                      | <i>O</i> -Linoleoyl- <i>O</i> -stearoyl-<br>sn-glycero-phosphate<br>isomer III | 34.35 | 699.4966<br>(0.6)        | 437, 279, 255   |                          |                                                                       | C <sub>39</sub> H <sub>73</sub> O <sub>8</sub> P                  | -  | -  | -   | +  | +   | -    | GNPS, [6] |
| <b>Nitrogenous lipid</b> |                                                                                |       |                          |                 |                          |                                                                       |                                                                   |    |    |     |    |     |      |           |
| 36.                      | Aminohexadecanediol                                                            | 20.50 |                          |                 | 274.2741<br>(-0.1)       | 256, 230, 212,<br>133, 119, 106,<br>81, 70                            | C <sub>16</sub> H <sub>35</sub> NO <sub>2</sub>                   | -  | tr | +   | +  | ++  | +++  | GNPS      |
| 37.                      | Aminotetradecanol                                                              | 20.67 |                          |                 | 230.2478<br>(0.3)        | 212, 147, 135,<br>119, 105, 85,<br>81, 71                             | C <sub>14</sub> H <sub>31</sub> NO                                | -  | -  | -   | tr | ++  | +++  |           |
| 38.                      | Sphingenine,<br>aminooctadec-enediol                                           | 20.74 |                          |                 | 300.2896<br>(0.3)        | 282, 272, 247,<br>191, 177, 163,<br>149, 135, 121,<br>105, 95, 81, 69 | C <sub>18</sub> H <sub>37</sub> NO <sub>2</sub>                   | -  | -  | -   | tr | +++ | tr   |           |

|     | Compound name                                               | RT    | M-H<br>(error in<br>ppm) | MS <sup>2</sup> | M+H<br>(error in<br>ppm) | MS <sup>2</sup>                                                                    | Formula                                                       | S1 | S2 | S3  | S4 | Am. | ChI. | Reference |
|-----|-------------------------------------------------------------|-------|--------------------------|-----------------|--------------------------|------------------------------------------------------------------------------------|---------------------------------------------------------------|----|----|-----|----|-----|------|-----------|
| 39. | Aminoheptadecanediol                                        | 21.33 |                          |                 | 288.2900<br>(-1.0)       | 270, 134, 106,<br>88, 71                                                           | C <sub>17</sub> H <sub>37</sub> NO <sub>2</sub>               | -  | tr | +++ | -  | -   | tr   |           |
| 40. | Amino-Icosanetetrol                                         | 23.26 |                          |                 | 362.3264<br>(0.2)        | 344, 314, 270,<br>238, 211                                                         | C <sub>20</sub> H <sub>43</sub> NO <sub>4</sub>               | -  | -  | -   | -  | +   | +++  | [7]       |
| 41. | Linoleic acid amide                                         | 23.74 |                          |                 | 296.2587<br>(-1.1)       | 278, 256, 209,<br>187, 161, 147,<br>135, 121, 109,<br>95, 81, 67                   | C <sub>18</sub> H <sub>33</sub> NO <sub>2</sub>               | -  | tr | -   | +  | -   | +++  | [8]       |
| 42. | <i>N</i> -Palmitoyl-L-arginine                              | 24.21 |                          |                 | 413.3489<br>(-0.7)       | 396, 354, 239,<br>175, 158                                                         | C <sub>22</sub> H <sub>44</sub> N <sub>4</sub> O <sub>3</sub> | -  | ++ | tr  | -  | -   | -    |           |
| 43. | <i>N</i> -<br>(dihydroxypropyl)octad<br>ecanamide           | 25.91 |                          |                 | 358.3315<br>(0.1)        | 340, 308, 298,<br>284, 266, 249,<br>217, 193, 165,<br>137, 123, 109,<br>95, 83, 69 | C <sub>20</sub> H <sub>41</sub> NO <sub>2</sub>               | -  | -  | -   | -  | +++ | tr   |           |
| 44. | C20 sphingosine                                             | 26.27 |                          |                 | 328.3208<br>(0.6)        | 311, 282, 268,<br>237, 193, 135,<br>121, 109, 102,<br>95, 81, 69                   | C <sub>20</sub> H <sub>41</sub> NO <sub>2</sub>               | tr | -  | -   | tr | +++ | +    |           |
| 45. | C20 Sphinganine,<br>icosasphinganine,<br>dihydrosphingosine | 27.31 |                          |                 | 330.3367<br>(-0.0)       | 312, 294, 282,<br>268, 217, 209,<br>193, 133, 109,<br>95, 83, 67                   | C <sub>20</sub> H <sub>43</sub> NO <sub>2</sub>               | tr | -  | -   | -  | +++ | -    |           |
| 46. | Aminoethyloleylamide                                        | 28.16 |                          |                 | 325.3208<br>(1.6)        | 307, 282, 268,<br>125, 109, 95,<br>81, 71                                          | C <sub>20</sub> H <sub>40</sub> N <sub>2</sub> O              |    | -  | -   | +  | +   | +    |           |

|                      | Compound name                                            | RT    | M-H<br>(error in<br>ppm) | MS <sup>2</sup> | M+H<br>(error in<br>ppm)        | MS <sup>2</sup>                                                                | Formula                                          | S1  | S2 | S3 | S4  | Am. | Chl. | Reference |
|----------------------|----------------------------------------------------------|-------|--------------------------|-----------------|---------------------------------|--------------------------------------------------------------------------------|--------------------------------------------------|-----|----|----|-----|-----|------|-----------|
| 47.                  | Palmitoylputrescine                                      | 26.96 |                          |                 | 327.3368<br>(0.5)               | 309, 269, 235,<br>193, 181, 165,<br>121, 107, 95,<br>81, 69                    | C <sub>20</sub> H <sub>42</sub> N <sub>2</sub> O | tr  | tr | -  |     | +++ | +++  |           |
| 48.                  | N-icosanoyl-glycine                                      | 29.77 |                          |                 | 370.3311<br>(1.3)               | 324, 102, 74                                                                   | C <sub>22</sub> H <sub>43</sub> NO <sub>3</sub>  | -   | -  | tr | -   | -   | +++  |           |
| 49.                  | Octadecanoyl-L-carnitine                                 | 30.02 |                          |                 | 428.3730<br>(1.1)               | 382, 364, 336,<br>207, 189, 144,<br>116, 98, 88                                | C <sub>25</sub> H <sub>49</sub> NO <sub>4</sub>  | -   | -  | -  | +   | ++  | +++  | [9]       |
| 50.                  | Unknown fatty acyl<br>amide                              | 33.77 |                          |                 | 336.3264<br>(-0.9)              | 249, 235, 219,<br>205, 189, 175,<br>161, 147, 135,<br>123, 109., 95,<br>81, 69 | C <sub>22</sub> H <sub>41</sub> NO               | +   | +  | +  | +++ | +   | +    |           |
| <b>Phytosteranes</b> |                                                          |       |                          |                 |                                 |                                                                                |                                                  |     |    |    |     |     |      |           |
| 51.                  | Phytostane A1                                            | 20.92 |                          |                 | 309.2057<br>(1.1)               | 291, 273, 263,<br>245, 227, 173,<br>145, 133, 119,<br>105, 93, 81              | C <sub>18</sub> H <sub>28</sub> O <sub>4</sub>   | +   | +  | +  | +   | -   | ++   | [10]      |
| 52.                  | Deoxyphytostane                                          | 22.13 |                          |                 | 291.196<br>(-2.0)               | 273, 245, 232,<br>193, 177, 161,<br>145, 135, 119,<br>105, 95, 81, 67          | C <sub>18</sub> H <sub>26</sub> O <sub>3</sub>   | -   | +  | -  | -   | -   | -    | [11]      |
| <b>Glycolipid</b>    |                                                          |       |                          |                 |                                 |                                                                                |                                                  |     |    |    |     |     |      |           |
| 53.                  | Hydroxydihydroprotoli<br>chesterinic acid-O-<br>hexoside | 22.50 |                          |                 | 555.3146<br>[M+Na] <sup>+</sup> | 393.2631,<br>259.079                                                           | C <sub>27</sub> H <sub>48</sub> O <sub>10</sub>  | +++ | tr | ++ | ++  | tr  | +    | [12]      |



|     | Compound name                                               | RT    | M-H<br>(error in<br>ppm) | MS <sup>2</sup>                        | M+H<br>(error in<br>ppm)                  | MS <sup>2</sup>                                   | Formula                                         | S1  | S2 | S3  | S4 | Am. | Chl. | Reference |
|-----|-------------------------------------------------------------|-------|--------------------------|----------------------------------------|-------------------------------------------|---------------------------------------------------|-------------------------------------------------|-----|----|-----|----|-----|------|-----------|
|     |                                                             |       |                          |                                        | (1.83)                                    |                                                   |                                                 |     |    |     |    |     |      |           |
| 54. | Hydroxy-<br>[(oxooctadecatrienyl)ox<br>ypropyl O-dihexoside | 24.09 | 675.3582<br>(2.2)        | 415, 397, 277,<br>119                  |                                           |                                                   | C <sub>33</sub> H <sub>56</sub> O <sub>14</sub> | +   | -  | +++ | +  | -   | tr   | [13]      |
| 55. | O- Octadecaenoic-O-di-<br>O-hexosyl-glycerol                | 25.41 |                          |                                        | 701.3726<br>(1.73)<br>[M+Na] <sup>+</sup> | 539, 494, 409,<br>359, 347, 335,<br>313, 263, 245 | C <sub>33</sub> H <sub>58</sub> O <sub>14</sub> | +++ | tr | ++  | ++ | tr  | tr   |           |
| 56. | Hexadecanoic acid-O-<br>dihexosyl glycerol,<br>isomer I     | 25.92 | 653.3748<br>(0.8)        | 415, 397, 255,<br>255, 89              | 655.3908<br>(-1.4)                        | 331, 313, 257,<br>239, 163, 91                    | C <sub>31</sub> H <sub>58</sub> O <sub>14</sub> | +   | +  | +   | ++ | +   | +    |           |
| 57. | Hexadecanoic acid O-<br>dihexosyl glycerol,<br>isomer II    | 26.63 | 653.3752<br>(0.3)        | 415, 397, 255,<br>235, 161, 119,<br>89 |                                           |                                                   | C <sub>31</sub> H <sub>58</sub> O <sub>14</sub> | +   | +  | +   | +  | +   | +    |           |
| 58. | O-linolenoyl-O-<br>hexosyl-glycerol                         | 27.17 |                          |                                        | 537.3038<br>(1.18)<br>[M+Na] <sup>+</sup> | 417, 375, 313,<br>299, 281, 259,<br>203           | C <sub>27</sub> H <sub>46</sub> O <sub>9</sub>  | +++ | tr | ++  | ++ | tr  | tr   |           |
| 59. | O-hexadecenoyl-<br>hexosyl-glycerol                         | 27.39 |                          |                                        | 513.3039<br>(1.74)<br>[M+Na] <sup>+</sup> | 261, 243, 203                                     | C <sub>25</sub> H <sub>46</sub> O <sub>9</sub>  | ++  | -  | ++  | +  | tr  | tr   |           |
| 60. | (O-acetyl-<br>hexosyl)oxy]octadecano<br>ic acid             | 29.89 |                          |                                        | 527.3198<br>(3.2)                         | 313                                               | C <sub>26</sub> H <sub>48</sub> O <sub>9</sub>  | +++ | -  | ++  | +  | -   | -    |           |
| 61. | O-hexadecanoyl-<br>hexosylglycerol                          | 30.26 |                          |                                        | 515.3197<br>(2.06)                        | 353., 313, 259,<br>203, 185                       | C <sub>25</sub> H <sub>48</sub> O <sub>9</sub>  | ++  | +  | ++  | +  | tr  | tr   |           |

|                      | Compound name                             | RT    | M-H<br>(error in<br>ppm) | MS <sup>2</sup> | M+H<br>(error in<br>ppm)               | MS <sup>2</sup>                                                        | Formula                                         | S1  | S2 | S3  | S4  | Am. | Chl. | Reference |
|----------------------|-------------------------------------------|-------|--------------------------|-----------------|----------------------------------------|------------------------------------------------------------------------|-------------------------------------------------|-----|----|-----|-----|-----|------|-----------|
|                      |                                           |       |                          |                 | [M+Na] <sup>+</sup>                    |                                                                        |                                                 |     |    |     |     |     |      |           |
| 62.                  | O-palmitoyl-O-hexosylglycerol             | 30.91 |                          |                 | 493.3378 (-1.4)                        | 331, 313, 257, 239, 221, 184, 137, 123, 109, 95, 85, 71                | C <sub>25</sub> H <sub>48</sub> O <sub>9</sub>  | +   | +  | +   | +   | tr  | +    | [14]      |
| 63.                  | O-linoleoyl-O-palmitoyl-O-hexosylglycerol | 37.60 |                          |                 | 777.5502 (1.24)<br>[M+Na] <sup>+</sup> | 521, 497, 313.                                                         | C <sub>43</sub> H <sub>78</sub> O <sub>10</sub> | -   | -  | +++ | tr  | tr  | +    |           |
| <b>Glycerolipids</b> |                                           |       |                          |                 |                                        |                                                                        |                                                 |     |    |     |     |     |      |           |
| 64.                  | Monolinolenoyl glycerol                   | 24.06 |                          |                 | 353.2688 (-0.5)                        | 261, 243, 233, 217, 201, 187, 173, 163, 149, 135, 121, 107, 93, 81, 67 | C <sub>21</sub> H <sub>36</sub> O <sub>4</sub>  | +   | -  | +   | +   | tr  | tr   | GNPS,     |
| 65.                  | Glyceryl palmitoleate                     | 24.28 |                          |                 | 329.2694 (-2.3)                        | 311, 299, 281, 257, 237, 219, 205, 163, 149, 135, 121, 109, 95, 83, 69 | C <sub>19</sub> H <sub>36</sub> O <sub>4</sub>  | +++ | tr | ++  | +   | -   | tr   | GNPS      |
| 66.                  | Palmitoyl glycerol                        | 26.52 |                          |                 | 331.2849 (-1.9)                        | 313, 257, 239, 221, 151, 123, 109, 95, 85, 71                          | C <sub>19</sub> H <sub>38</sub> O <sub>4</sub>  | +   | +  | +   | +   | +   | +    |           |
| 67.                  | Linoleoyl glycerol                        | 28.71 |                          |                 | 355.2847 (-1.2)                        | 337, 263, 245, 203, 189, 175, 161, 147, 133, 123, 109, 95, 81, 67      | C <sub>21</sub> H <sub>38</sub> O <sub>4</sub>  | +++ | tr | +++ | +++ | -   | tr   | GNPS      |

|                  | Compound name          | RT    | M-H<br>(error in<br>ppm) | MS <sup>2</sup> | M+H<br>(error in<br>ppm) | MS <sup>2</sup>                                                               | Formula                                                       | S1  | S2 | S3  | S4  | Am. | ChI. | Reference |
|------------------|------------------------|-------|--------------------------|-----------------|--------------------------|-------------------------------------------------------------------------------|---------------------------------------------------------------|-----|----|-----|-----|-----|------|-----------|
| 68.              | Linoleoyl Glycerol     | 29.24 |                          |                 | 355.2846<br>(-0.9)       | 337, 263, 245,<br>203, 189, 175,<br>161, 147, 133,<br>123, 109, 95,<br>81, 67 | C <sub>21</sub> H <sub>38</sub> O <sub>4</sub>                | +++ | tr | +++ | +++ | +++ | tr   | GNPS      |
| <b>Porphyrin</b> |                        |       |                          |                 |                          |                                                                               |                                                               |     |    |     |     |     |      |           |
| 69.              | Unknown                | 24.48 |                          |                 | 643.2771<br>(-1.3)       | 625, 593, 565,<br>335                                                         | C <sub>35</sub> H <sub>38</sub> N <sub>4</sub> O <sub>8</sub> | +   | tr | +   | +++ | tr  | +    |           |
| 70.              | Unknown                | 25.64 |                          |                 | 643.2770<br>(-1.2)       | 625, 593, 565,<br>335                                                         | C <sub>35</sub> H <sub>38</sub> N <sub>4</sub> O <sub>8</sub> | +   | tr | +   | +++ | tr  | +    |           |
| 71.              | Unknown                | 28.78 |                          |                 | 657.2925<br>(-0.9)       | 639, 607, 579,<br>487, 349, 333,<br>313                                       | C <sub>36</sub> H <sub>40</sub> N <sub>4</sub> O <sub>8</sub> | ++  | tr | ++  | ++  | tr  | +    |           |
| 72.              | Unknown                | 29.92 |                          |                 | 627.2454<br>(-0.8)       | 609, 595, 577,<br>549                                                         | C <sub>34</sub> H <sub>34</sub> N <sub>4</sub> O <sub>8</sub> | +   | tr | +   | +++ | tr  | tr   |           |
| 73.              | Unknown                | 30.30 |                          |                 | 625.2664<br>(-1.1)       | 607, 575, 547,<br>531, 501                                                    | C <sub>35</sub> H <sub>36</sub> N <sub>4</sub> O <sub>7</sub> | +   | +  | +   | +++ | tr  | +    | [15]      |
| 74.              | Bacteriopheophorbide a | 31.14 |                          |                 | 611.2869<br>(-0.8)       | 567, 538, 494,<br>465, 317                                                    | C <sub>35</sub> H <sub>38</sub> N <sub>4</sub> O <sub>6</sub> | +   | -  | +   | +++ | -   | +    | [16]      |
| 75.              | Unknown                | 31.19 |                          |                 | 583.2555<br>(-0.7)       | 565, 539, 521,<br>503, 495, 477,<br>466                                       | <u>C<sub>33</sub>H<sub>34</sub>N<sub>4</sub>O<sub>6</sub></u> | +   | +  | +   | +++ | +   | +    |           |
| 76.              | Unknown                | 33.88 |                          |                 | 569.2766<br>(-1.3)       | 551, 536., 519,<br>482, 464, 449,<br>325, 291                                 | C <sub>33</sub> H <sub>36</sub> N <sub>4</sub> O <sub>5</sub> | +   | -  | +   | +++ | -   | +    |           |

|     | Compound name                                                                                                                                         | RT    | M-H<br>(error in<br>ppm) | MS <sup>2</sup> | M+H<br>(error in<br>ppm) | MS <sup>2</sup>                         | Formula                                                       | S1  | S2 | S3 | S4  | Am. | Chl. | Reference |
|-----|-------------------------------------------------------------------------------------------------------------------------------------------------------|-------|--------------------------|-----------------|--------------------------|-----------------------------------------|---------------------------------------------------------------|-----|----|----|-----|-----|------|-----------|
| 77. | Mesoporphyrin IX                                                                                                                                      | 34.09 |                          |                 | 567.2974<br>(-1.5)       | 535, 507, 494,<br>479, 421, 291         | C <sub>34</sub> H <sub>38</sub> N <sub>4</sub> O <sub>4</sub> | -   | -  | -  | +++ | -   | tr   |           |
| 78. | Unknown                                                                                                                                               | 34.26 |                          |                 | 597.2715<br>(-1.3)       | 579, 565, 553,<br>537, 521, 503,<br>477 | C <sub>34</sub> H <sub>36</sub> N <sub>4</sub> O <sub>6</sub> | +   | +  | +  | +++ | +   | ++   |           |
| 79. | Unkown                                                                                                                                                | 36.19 |                          |                 | 625.3026<br>(-0.9)       | 565., 552, 479,<br>313                  | C <sub>36</sub> H <sub>40</sub> N <sub>4</sub> O <sub>6</sub> | +   | tr | +  | +++ | -   | tr   |           |
| 80. | Harderoporphyrin<br>Ethenyl-3,8,13,17-<br>tetramethyl-21H,23H-<br>porphine-2,7,18-<br>tripropanoic acid                                               | 36.92 |                          |                 | 609.2720<br>(-2.0)       | 591, 577, 559,<br>549, 531, 503,<br>485 | C <sub>35</sub> H <sub>36</sub> N <sub>4</sub> O <sub>6</sub> | +++ | tr | ++ | ++  | tr  | tr   | [17]      |
| 81. | Methyl 8-ethyl-12-<br>methylbacteriopheophor-<br>bide c                                                                                               | 37.24 |                          |                 | 581.3132<br>(-1.7)       | 508, 421, 300                           | <u>C<sub>35</sub>H<sub>40</sub>N<sub>4</sub>O<sub>4</sub></u> | -   | -  |    | +++ | -   | -    |           |
| 82. | Tetramethyl-3-<br>(methoxycarbonyl)-5-<br>(1,2-dioxo-2-<br>methoxyethyl)-13-vinyl-<br>18-ethyl-7,8-dihydro-<br>21H,23H-porphyrin-7-<br>propionic acid | 37.97 |                          |                 | 639.2823<br>(-1.5)       | 607, 579, 552,<br>537, 493, 479         | <u>C<sub>36</sub>H<sub>38</sub>N<sub>4</sub>O<sub>7</sub></u> | +++ | +  | +  | ++  | tr  | +    | [18]      |
| 83. | Hydroxy pheophorbide<br>a                                                                                                                             | 39.35 |                          |                 | 609.2707<br>(0.1)        | 550, 309, 101                           | C <sub>35</sub> H <sub>36</sub> N <sub>4</sub> O <sub>6</sub> | +   | +  | +  | +++ | tr  | tr   | [19]      |

|                          | Compound name                                                              | RT    | M-H<br>(error in<br>ppm) | MS <sup>2</sup> | M+H<br>(error in<br>ppm) | MS <sup>2</sup>                                                               | Formula                                                       | S1  | S2  | S3  | S4  | Am. | ChI. | Reference |
|--------------------------|----------------------------------------------------------------------------|-------|--------------------------|-----------------|--------------------------|-------------------------------------------------------------------------------|---------------------------------------------------------------|-----|-----|-----|-----|-----|------|-----------|
| 84.                      | Pheophorbide a                                                             | 39.69 |                          |                 | 593.2753<br>(1.0)        | 533, 459                                                                      | C <sub>35</sub> H <sub>36</sub> N <sub>4</sub> O <sub>5</sub> | -   | +   | -   | +   | -   | -    | [20]      |
| <b>Hydrocarbons</b>      |                                                                            |       |                          |                 |                          |                                                                               |                                                               |     |     |     |     |     |      |           |
| 85.                      | Octadecatetraenal                                                          | 27.17 |                          |                 | 261.2215<br>(-0.7)       | 243, 233, 217,<br>201, 187, 177,<br>161, 145, 131,<br>121, 107, 93,<br>81, 67 | C <sub>18</sub> H <sub>28</sub> O                             | +++ | -   | +++ | ++  | tr  | +    |           |
| <b>Sulpholipids</b>      |                                                                            |       |                          |                 |                          |                                                                               |                                                               |     |     |     |     |     |      |           |
| 86.                      | <i>O</i> -palmitoyl- <i>O</i> -(sulfo-<br>galactosyl) glycerol<br>isomer I | 31.82 | 555.2848<br>(-0.5)       | 225             |                          |                                                                               | C <sub>25</sub> H <sub>48</sub> O <sub>11</sub> S             | -   | +++ | +   | -   | -   | -    | [21]      |
| 87.                      | <i>O</i> -palmitoyl- <i>O</i> -(sulfo-<br>hexosyl) glycerol<br>isomer II   | 32.23 | 555.2848<br>(-0.6)       | 299, 255, 225   |                          |                                                                               | C <sub>25</sub> H <sub>48</sub> O <sub>11</sub> S             | +++ | -   | -   | +   | -   | -    | [21]      |
| <b>Carboximidic acid</b> |                                                                            |       |                          |                 |                          |                                                                               |                                                               |     |     |     |     |     |      |           |
| 88.                      | <i>N</i> -(hydroxyethyl)-<br>hexadecenamide                                | 32.42 |                          |                 | 298.2736<br>(1.6)        | 279, 251, 233,<br>219, 183, 153,<br>135, 121, 107,<br>95, 83, 69              | C <sub>18</sub> H <sub>35</sub> NO <sub>2</sub>               | +   | +   | +++ | -   | -   | ++   |           |
| 89.                      | <i>N</i> -(hydroxyethyl)<br>octadecadienamide                              | 33.43 |                          |                 | 324.2900<br>(-0.9)       | 306, 284, 147,<br>121, 95, 81,62                                              | C <sub>20</sub> H <sub>37</sub> NO <sub>2</sub>               | +   | +   | +++ | +++ | ++  | ++   | GNPS      |

**Supplementary Table S2:** The relative percentage of silylated metabolites in *Spirulina* (S1, S2 & S3), *Amphora* (Am.) and *Chlorella* (Chl.) samples analyzed via GC-MS, n= 3

| Compound number            | Average Rt(min) | Average RI | Metabolite name             | Chemical Class       | S1          | S3          | S4          | Am.          | Chl.         |
|----------------------------|-----------------|------------|-----------------------------|----------------------|-------------|-------------|-------------|--------------|--------------|
| <b>Acohols</b>             |                 |            |                             |                      |             |             |             |              |              |
| 1.                         | 6.413           | 1141.34    | 2,3-Butanediol, 2TMS        | Alcohol              | 0.28 ±0.07  | 0.09 ±0.01  | 0.07 ±0.001 | 0.56 ±0.12   | 0.36 ±0.07   |
| 2.                         | 6.943           | 1174.21    | Glycerol, 2TMS              | Alcohol              | 1.11 ±0.14  | 0.72 ±0.09  | 0.46 ±0.02  | 0.20 ±0.04   | 0.99 ±0.47   |
| 3.                         | 8.321           | 1269.18    | Glycerol, 3TMS              | Alcohol              | 0.14 ±0.01  | 0.49 ±0.18  | 0.10 ±0.01  | 5.28 ±0.76   | 3.54 ±0.68   |
| <b>Total Alcohols</b>      |                 |            |                             |                      | <b>1.57</b> | <b>1.31</b> | <b>0.64</b> | <b>6.04</b>  | <b>4.89</b>  |
| <b>Amino acids</b>         |                 |            |                             |                      |             |             |             |              |              |
| 4.                         | 5.805           | 1103.54    | Alanine, 2TMS               | Amino acid           | 0.88 ±0.06  | 1.96 ±0.72  | 0.65 ±0.09  | 12.33 ±1.89  | 3.26 ±0.58   |
| 5.                         | 7.18            | 1189.07    | Valine, 2TMS                | Amino acid           | 1.42 ±0.10  | 1.52 ±0.30  | 0.87 ±0.02  | 0.24 ±0.09   | 1.14 ±0.35   |
| 6.                         | 7.51            | 1210.96    | Leucine, 2TMS               | Amino acid           | 0.22 ±0.01  | 0.42 ±0.13  | 0.15 ±0.01  | 7.30 ±1.05   | 4.84 ±0.79   |
| 7.                         | 7.76            | 1228.92    | Isoleucine, 2TMS            | Amino acid           | 0.69 ±0.23  | 0.27 ±0.05  | 0.18 ±0.04  | 1.03 ±0.19   | 2.72 ±0.51   |
| 8.                         | 8.633           | 1291.56    | Allo-isoleucine, 2TMS       | Amino acid           | 0.13 ±0.01  | 0.22 ±0.06  | 0.08 ±0.001 | 3.31 ±0.46   | 2.24 ±0.39   |
| 9.                         | 9.965           | 1387.15    | Serine, 3TMS                | Amino acid           | 1.03 ±0.10  | 0.19 ±0.09  | 0.12 ±0.02  | 0.48 ±0.05   | 0.68 ±0.30   |
| 10.                        | 11.057          | 1473.52    | Aspartic acid, 3TMS         | Amino acid           | 0.08 ±0.01  | 0.16 ±0.02  | 0.10 ±0.02  | 0.82 ±0.10   | 0.55 ±0.12   |
| 11.                        | 11.635          | 1520.16    | L-5-Oxoproline, 2TMS        | Amino acid           | 0.68 ±0.18  | 1.13 ±0.45  | 0.12 ±0.01  | 1.09 ±0.16   | 0.16 ±0.07   |
| 12.                        | 12.882          | 1622.94    | Glutamic acid, 3TMS         | Amino acid           | 1.23 ±0.64  | 0.30 ±0.13  | 0.09 ±0.03  | 1.09 ±0.65   | 1.65 ±0.32   |
| 13.                        | 12.893          | 1624       | Phenylalanine, 2TMS         | Amino acid           | 0.01 ±0.001 | 0.09 ±0.04  | 0.01 ±0.001 | 0.73 ±0.07   | 0.35 ±0.09   |
| 14.                        | 16.252          | 1939       | Tyrosine, 3TMS              | Nitrogenous compound | 0.04 ±0.01  | 0.09 ±0.02  | 0.02 ±0.001 | 0.30 ±0.02   | 0.62 ±0.14   |
| <b>Total Amino Acids</b>   |                 |            |                             |                      | <b>6.41</b> | <b>6.36</b> | <b>2.39</b> | <b>28.71</b> | <b>18.12</b> |
| <b>Fatty acids/ esters</b> |                 |            |                             |                      |             |             |             |              |              |
| 15.                        | 14.936          | 1808.39    | Myristic acid, TMS          | Fatty acid/ester     | 0.33 ±0.09  | 0.13 ±0.02  | 0.33 ±0.19  | 0.30 ±0.02   | 0.96 ±0.39   |
| 16.                        | 15.939          | 1908.4     | Palmitic acid, methyl ester | Fatty acid/ester     | 0.72 ±0.11  | 0.26 ±0.03  | 0.24 ±0.03  | 0.56 ±0.06   | 1.28 ±0.39   |
| 17.                        | 17.116          | 2027.1     | Palmitic Acid, TMS          | Fatty acid/ester     | 20.22 ±0.58 | 15.23 ±3.73 | 9.24 ±0.16  | 10.18 ±1.51  | 8.31 ±2.08   |
| 18.                        | 18.483          | 2175.67    | Linolenic acid, TMS         | Fatty acid/ester     | 0.63 ±0.08  | 0.76 ±0.09  | 0.56 ±0.03  | 0.35 ±0.10   | 0.20 ±0.09   |
| 19.                        | 18.638          | 2192.52    | Linoleic acid isomer, TMS   | Fatty acid/ester     | 1.76 ±0.03  | 2.40 ±0.27  | 1.74 ±0.07  | 1.85 ±0.17   | 1.38 ±0.57   |

|                                  |        |         |                                                      |                      |              |              |              |              |              |
|----------------------------------|--------|---------|------------------------------------------------------|----------------------|--------------|--------------|--------------|--------------|--------------|
| 20.                              | 18.682 | 2197.28 | Oleic Acid, TMS                                      | Fatty acid/ester     | 0.19 ±0.02   | 0.34 ±0.03   | 0.20 ±0.03   | 0.22 ±0.03   | 0.16 ±0.06   |
| 21.                              | 18.895 | 2222.22 | Stearic acid, TMS                                    | Fatty acid/ester     | 6.86 ±0.46   | 6.04 ±2.64   | 0.16 ±0.02   | 0.73 ±0.15   | 0.86 ±0.12   |
| 22.                              | 21.482 | 2538.3  | Arachidic acid, TMS                                  | Fatty acid/ester     | 0.31 ±0.05   | 0.21 ±0.001  | 0.23 ±0.08   | 0.41 ±0.03   | 1.05 ±0.24   |
| 23.                              | 21.499 | 2540.5  | 2-Palmitoylglycerol, 2TMS                            | Fatty acid/ester     | 0.09 ±0.03   | 0.05 ±0.01   | 0.02 ±0.01   | 0.07 ±0.06   | 0.14 ±0.08   |
| 24.                              | 21.757 | 2573.46 | 1-Monopalmitin, 2TMS                                 | Fatty acid/ester     | 3.36 ±1.43   | 2.05 ±0.84   | 0.53 ±0.29   | 7.58 ±3.65   | 8.94 ±6.26   |
| 25.                              | 23.164 | 2764.98 | Glycerol monostearate, 2TMS                          | Fatty acid/ester     | 3.44 ±1.59   | 2.15 ±1.06   | 0.48 ±0.34   | 9.35 ±4.83   | 9.65 ±7.66   |
| <b>Total Fatty Acid/ Esters</b>  |        |         |                                                      |                      | <b>37.93</b> | <b>29.63</b> | <b>13.72</b> | <b>31.60</b> | <b>32.93</b> |
| <b>Glycosides</b>                |        |         |                                                      |                      |              |              |              |              |              |
| 26.                              | 19.365 | 2277.58 | Glyceryl-glycoside TMS ether                         | Glycoside            | 22.68 ±3.14  | 27.38 ±12.28 | 40.11 ±0.17  | Traces       | 0.36 ±0.16   |
| 27.                              | 19.769 | 2325.14 | 2-O-Glycerol-galactopyranoside, 6TMS                 | Glycoside            | 1.03 ±0.03   | 1.75 ±0.07   | 0.36 ±0.15   | 0.15 ±0.07   | 2.74 ±0.94   |
| 28.                              | 20.374 | 2396.6  | 2-O-Glycerol-galactopyranoside, 6-TMS                | Glycoside            | 0.51 ±0.11   | 0.35 ±0.03   | 0.38 ±0.11   | 0.57 ±0.09   | 0.82 ±0.29   |
| <b>Total Glycosides</b>          |        |         |                                                      |                      | <b>24.22</b> | <b>29.48</b> | <b>40.85</b> | <b>0.72</b>  | <b>3.92</b>  |
| <b>Hydrocarbons</b>              |        |         |                                                      |                      |              |              |              |              |              |
| 29.                              | 13.563 | 1684.17 | Pentadecane, 2,6,10-trimethyl-                       | Hydrocarbon          | 1.23 ±0.11   | 0.51 ±0.14   | 0.17 ±0.01   | 0.03 ±0.01   | 0.07 ±0.02   |
| <b>Total Hydrocarbons</b>        |        |         |                                                      |                      | <b>1.23</b>  | <b>0.51</b>  | <b>0.17</b>  | <b>0.03</b>  | <b>0.07</b>  |
| <b>Inorganic compounds</b>       |        |         |                                                      |                      |              |              |              |              |              |
| 30.                              | 14.57  | 1774.68 | Phosphoric acid, 2,3-(2-TMS)propyl (2-TMS) ester     | Inorganic Compound   | 0.13 ±0.03   | 0.04 ±0.01   | 0.03 ±0.01   | 1.09 ±0.20   | 0.46 ±0.14   |
| 31.                              | 18.718 | 2201.34 | Phosphoric acid, 2[2,3-(2-TMS)oxy]propyl] TMS, ester | Inorganic Compound   | 0.05 ±0.001  | 0.04 ±0.01   | 0.02 ±0.001  | 0.07 ±0.02   | 0.26 ±0.03   |
| <b>Total Inorganic Compounds</b> |        |         |                                                      |                      | <b>0.18</b>  | <b>0.08</b>  | <b>0.05</b>  | <b>1.16</b>  | <b>0.72</b>  |
| <b>Nitrogenous compounds</b>     |        |         |                                                      |                      |              |              |              |              |              |
| 32.                              | 6.921  | 1172.94 | 2-Aminobutanoic acid                                 | Nitrogenous compound | 0.50 ±0.14   | 0.16 ±0.03   | 0.13 ±0.03   | 0.36 ±0.05   | 0.42 ±0.09   |
| 33.                              | 8.379  | 1273.49 | Niacin, TMS                                          | Nitrogenous compound | 2.62 ±0.09   | 3.66 ±1.09   | 5.99 ±0.04   | 11.98 ±1.46  | 9.27 ±2.03   |
| 34.                              | 9.031  | 1320.13 | Unknown nitrogenous compound                         | Nitrogenous compound | 0.23 ±0.06   | 0.12 ±0.001  | 0.09 ±0.001  | 0.21 ±0.05   | 0.08 ±0.04   |
| 35.                              | 9.584  | 1359.79 | Uracil, 2TMS                                         | Nitrogenous compound | 0.17 ±0.04   | 0.22 ±0.06   | 0.03 ±0.01   | 0.09 ±0.01   | 0.04 ±0.01   |

|                                    |        |         |                                        |                      |              |              |              |              |               |
|------------------------------------|--------|---------|----------------------------------------|----------------------|--------------|--------------|--------------|--------------|---------------|
| 36.                                | 15.176 | 1832.51 | Adenine, 2TMS                          | Nitrogenous compound | 0.59 ±0.09   | 0.25 ±0.04   | 0.16 ±0.03   | 0.96 ±0.11   | 2.04 ±0.26    |
| 37.                                | 22.265 | 2641.37 | Adenosine, 4TMS                        | Nitrogenous compound | 0.27 ±0.10   | 0.24 ±0.03   | 0.18 ±0.07   | 0.95 ±0.29   | 0.44 ±0.16    |
| <b>Total Nitrogenous Compounds</b> |        |         |                                        |                      | <b>4.38</b>  | <b>4.65</b>  | <b>6.59</b>  | <b>14.56</b> | <b>12.31</b>  |
| <b>Organic acids</b>               |        |         |                                        |                      |              |              |              |              |               |
| 38.                                | 8.857  | 1307.63 | Succinic acid, 2-TMS                   | Organic acid         | 1.64 ±0.07   | 1.30 ±0.17   | 1.32 ±0.05   | 2.18 ±0.27   | 0.48 ±0.12    |
| 39.                                | 5.094  | 1059.37 | Lactic Acid, 2TMS                      | Organic acid         | 0.26 ±0.07   | 0.07 ±0.001  | 0.07 ±0.01   | 1.24 ±0.30   | 0.5 ±0.09     |
| 40.                                | 5.175  | 1064.38 | Caproic acid, TMS                      | Organic acid         | 5.80 ±0.70   | 5.39 ±0.66   | 3.65 ±0.22   | 7.95 ±1.16   | 5.77 ±1.16    |
| 41.                                | 5.385  | 1077.44 | Glycolic acid, 2TMS                    | Organic acid         | 0.58 ±0.08   | 0.39 ±0.09   | 0.19 ±0.01   | 0.32 ±0.03   | 0.48 ±0.15    |
| 42.                                | 5.566  | 1088.72 | Pyruvic acid, 2-TMS                    | Organic acid         | 0.45 ±0.08   | 0.12 ±0.01   | 0.07 ±0.01   | 0.53 ±0.06   | 1.76 ±0.86    |
| 43.                                | 6.215  | 1129.06 | Methylmalonic acid, 2TMS               | Organic acid         | 0.60 ±0.17   | 0.18 ±0.02   | 0.14 ±0.02   | 0.68 ±0.10   | 1.14 ±0.25    |
| 44.                                | 6.662  | 1156.79 | 3-Hydroxybutyric acid, 2TMS derivative | Organic acid         | 1.70 ±0.16   | 3.01 ±0.70   | 1.59 ±0.02   | 0.64 ±0.10   | 0.56 ±0.17    |
| 45.                                | 9.18   | 1330.8  | Glyceric acid, 3TMS                    | Organic acid         | 0.26 ±0.03   | 0.38 ±0.06   | 0.25 ±0.01   | 0.20 ±0.03   | 0.29 ±0.05    |
| 46.                                | 10.523 | 1430.54 | 3,4-dihydroxybutyric acid, 3-TMS       | Organic acid         | 0.31 ±0.06   | 0.21 ±0.05   | 0.10 ±0.01   | 0.34 ±0.10   | 0.31 ±0.08    |
| <b>Total Organic Acids</b>         |        |         |                                        |                      | <b>11.60</b> | <b>11.06</b> | <b>7.38</b>  | <b>14.08</b> | <b>11.28</b>  |
| <b>Phenolics</b>                   |        |         |                                        |                      |              |              |              |              |               |
| 47.                                | 12.808 | 1616.29 | 1,2,4-Benzenetriol, 3-TMS ether        | Phenolic             | 2.79 ±0.23   | 0.90 ±0.04   | 0.70 ±0.03   | 0.20 ±0.02   | Traces        |
| <b>Total Phenolics</b>             |        |         |                                        |                      | <b>2.79</b>  | <b>0.90</b>  | <b>0.70</b>  | <b>0.20</b>  | <b>Traces</b> |
| <b>Sugars</b>                      |        |         |                                        |                      |              |              |              |              |               |
| 48.                                | 15.594 | 1873.69 | Rhamnose, 4TMS                         | Sugar                | 0.15 ±0.02   | 0.10 ±0.01   | 0.05 ±0.01   | 0.32 ±0.09   | 0.50 ±0.07    |
| 49.                                | 15.924 | 1906.45 | Glucose, 5TMS derivative               | Sugar                | 0.09 ±0.03   | 0.08 ±0.03   | 0.03 ±0.01   | 0.09 ±0.02   | 0.78 ±0.52    |
| 50.                                | 16.481 | 1961.72 | Glucose isomer, 5TMS derivative        | Sugar                | 0.20 ±0.05   | 0.13 ±0.02   | 0.31 ±0.14   | 0.27 ±0.05   | 0.90 ±0.50    |
| 51.                                | 19.844 | 2334.16 | 3-Mannobiose, 8-TMS ether isomer       | Sugar                | 7.42 ±0.83   | 13.37 ±0.77  | 24.76 ±0.10  | 0.18 ±0.04   | 2.74 ±0.94    |
| 52.                                | 20.195 | 2375.54 | Maltose, 8TMS derivative               | Sugar                | 0.16 ±0.01   | 0.24 ±0.02   | 0.58 ±0.02   | 0.03 ±0.03   | Traces        |
| 53.                                | 22.524 | 2677    | Sucrose, 8TMS                          | Sugar                | 0.63 ±0.19   | 0.67 ±0.42   | 0.23 ±0.09   | 0.90 ±0.20   | 8.56 ±4.68    |
| 54.                                | 26.331 | 3072.06 | Melibiose isomer, 8TMS                 | Sugar                | 0.42 ±0.03   | 0.91 ±0.33   | 1.04 ±0.02   | 0.46 ±0.11   | 1.01 ±0.37    |
| <b>Total Sugars</b>                |        |         |                                        |                      | <b>9.07</b>  | <b>15.49</b> | <b>27.00</b> | <b>2.25</b>  | <b>14.48</b>  |



|                               |        |         |                    |                 |             |             |             |             |             |
|-------------------------------|--------|---------|--------------------|-----------------|-------------|-------------|-------------|-------------|-------------|
| 55.                           | 17.86  | 2107.63 | Myo-Inositol, 6TMS | Sugar alcohol   | 0.06 ±0.01  | 0.06 ±0.01  | 0.03 ±0.001 | 0.15 ±0.01  | 0.10 ±0.06  |
| <b>Total Sugar Alcohols</b>   |        |         |                    |                 | <b>0.06</b> | <b>0.06</b> | <b>0.03</b> | <b>0.15</b> | <b>0.10</b> |
| <b>Terpene alcohols</b>       |        |         |                    |                 |             |             |             |             |             |
| 56.                           | 18.326 | 2158.52 | Phytol, TMS        | Terpene alcohol | 0.57 ±0.10  | 0.48 ±0.06  | 0.48 ±0.01  | 0.51 ±0.05  | 1.08 ±0.34  |
| <b>Total Terpene Alcohols</b> |        |         |                    |                 | <b>0.57</b> | <b>0.48</b> | <b>0.48</b> | <b>0.51</b> | <b>1.08</b> |

**Supplementary Table S3: Sample codes**

| <b>Sample code</b> | <b>Sample</b>     | <b>Source</b>              |
|--------------------|-------------------|----------------------------|
| S1                 | Spirulina         | spring valley, USA         |
| S2                 | Spirulina tablets | GNC superfoods, USA        |
| S3                 | Spirulina tablets | Gse vertrieb Gmbh, Germany |
| S4                 | Spirulina powder  | Imtenan, Egypt             |
| Am.                | Amphora powder    | NRC                        |
| Chl.               | Chlorella powder  | NRC                        |

**Supplementary Table S4: Parameters used for the construction of the feature-based molecular networks**

|                              |      |
|------------------------------|------|
| Precursor ion mass tolerance | 0.05 |
| Fragment ion mass tolerance  | 0.05 |
| Cosine score                 | 0.7  |
| Minimum matching fragments   | 6    |

**Supp. Fig. S1: Base Peak Chromatogram (BPC) of the studied algal species in the negative ionization mode.**

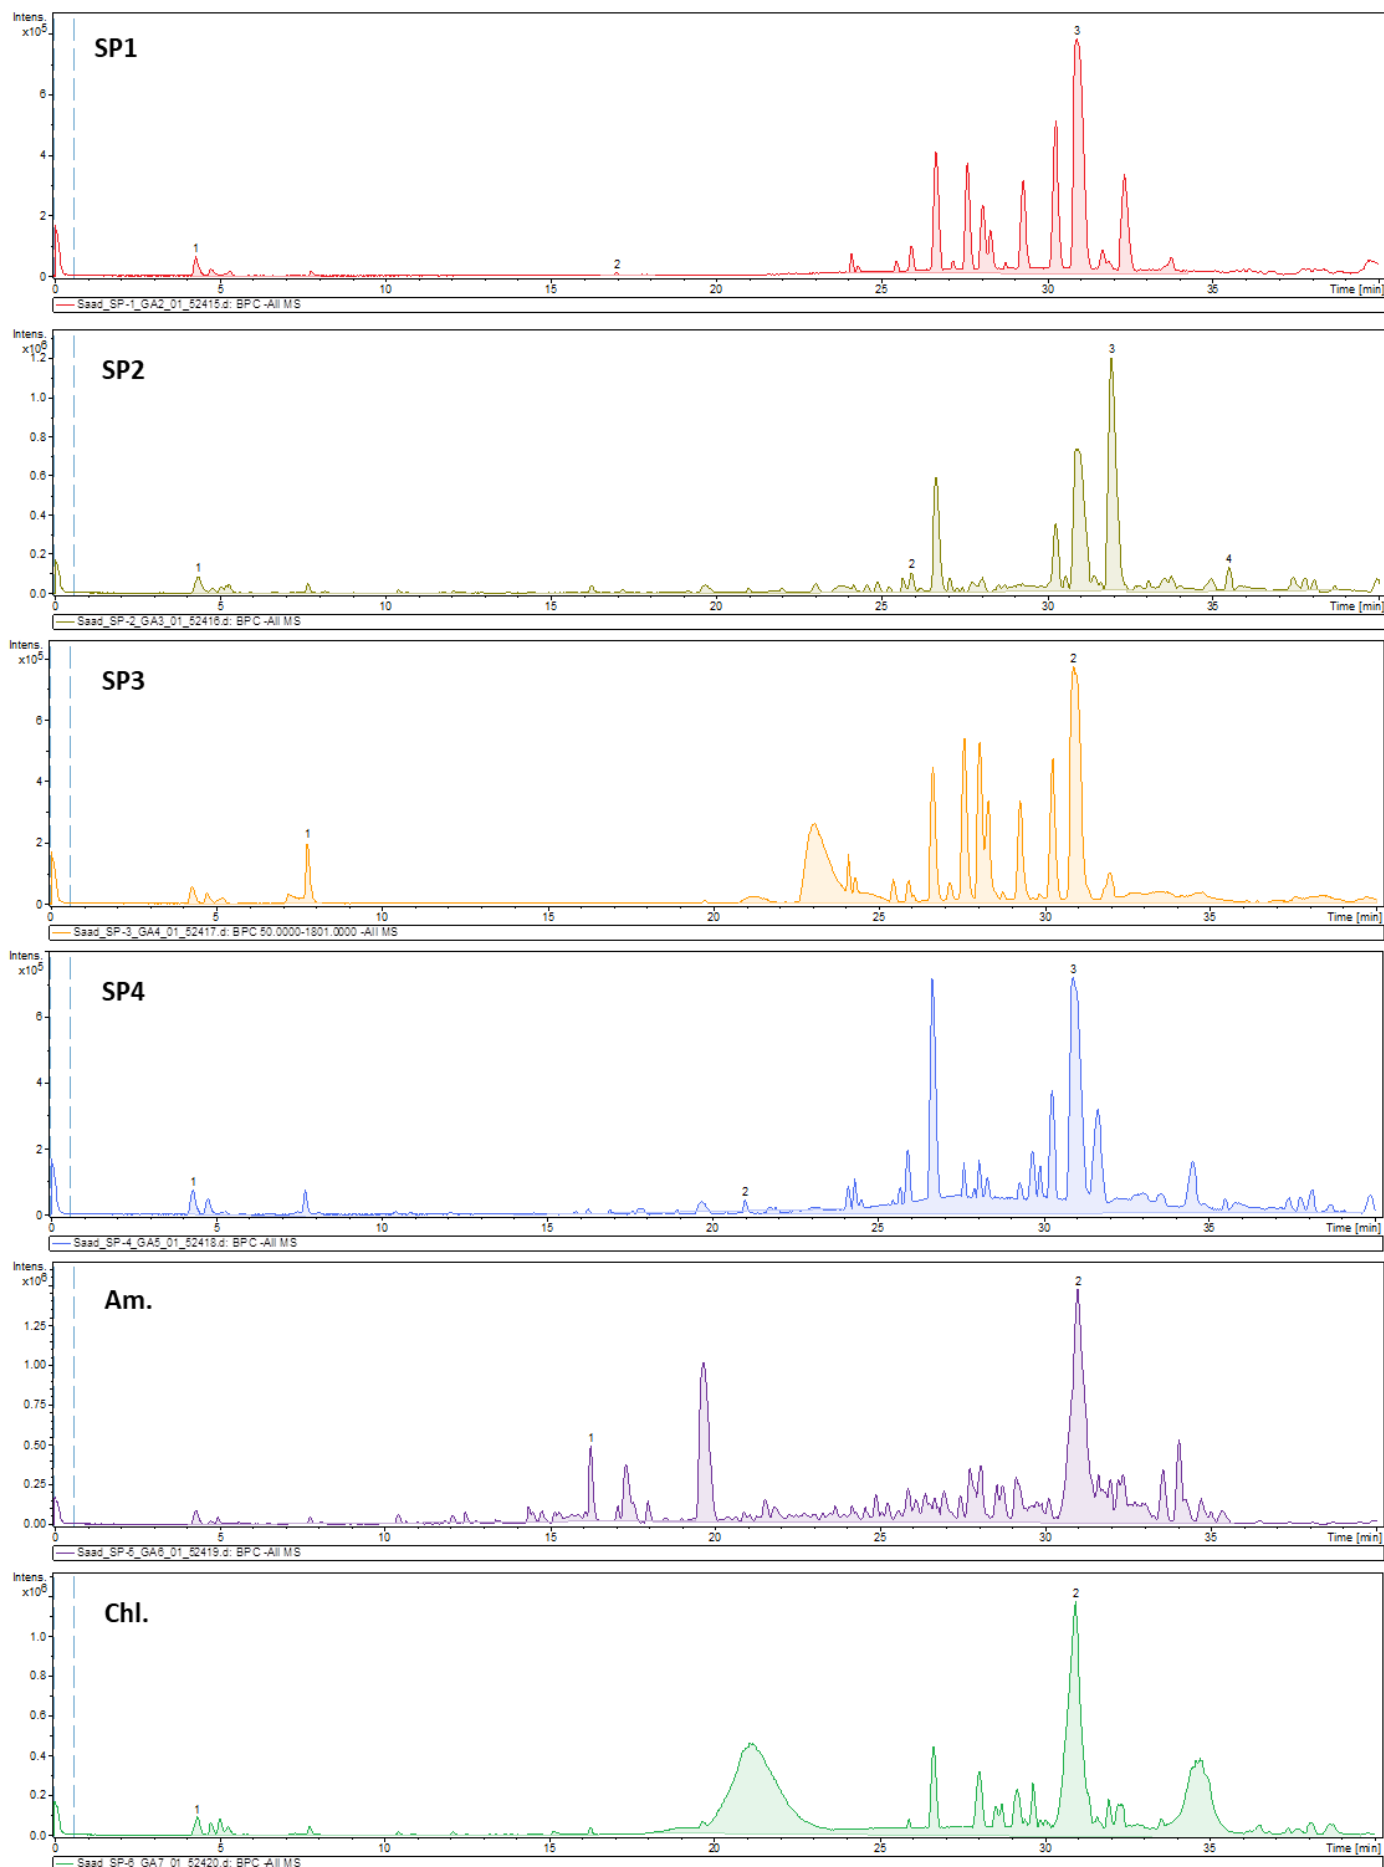



Supp. Fig. S3: MS<sup>2</sup> spectrum of compound 4, tetrahydroxy octadecadienoic acid in the negative ionization mode

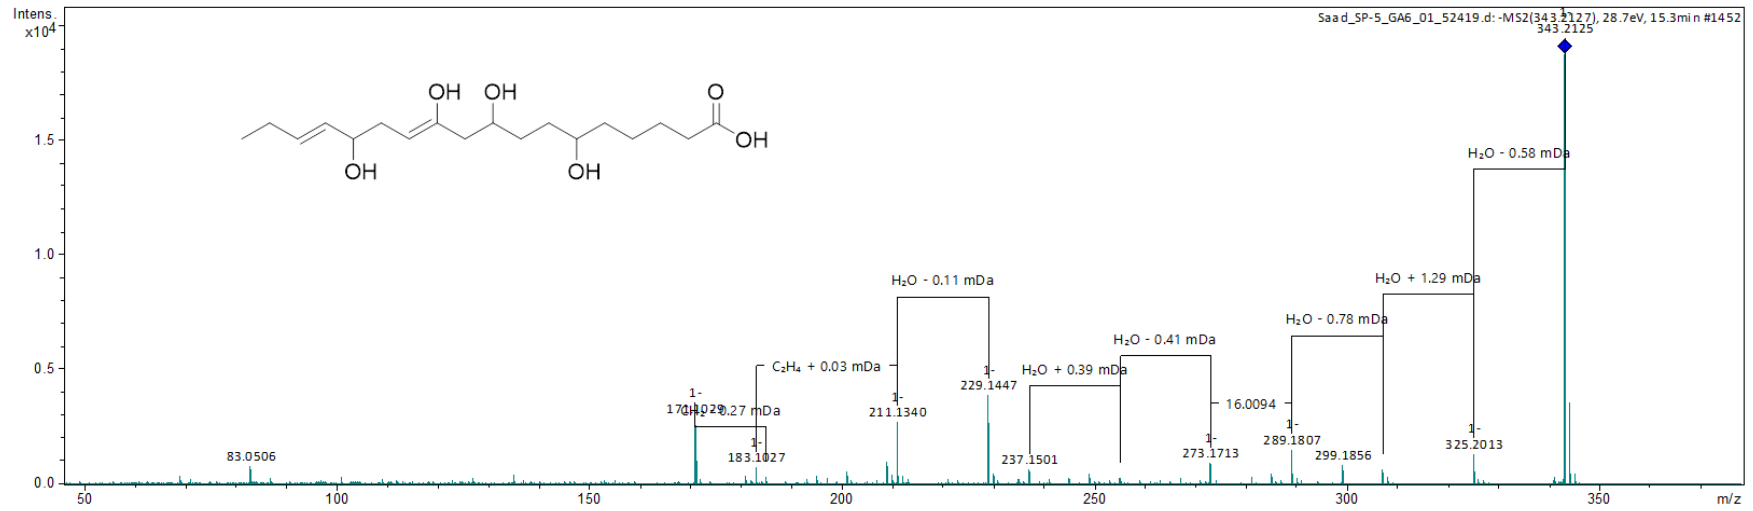

Supp. Fig. S4: MS<sup>2</sup> spectrum of compound 8, oxo-octadecadienoic acid in the positive ionization mode

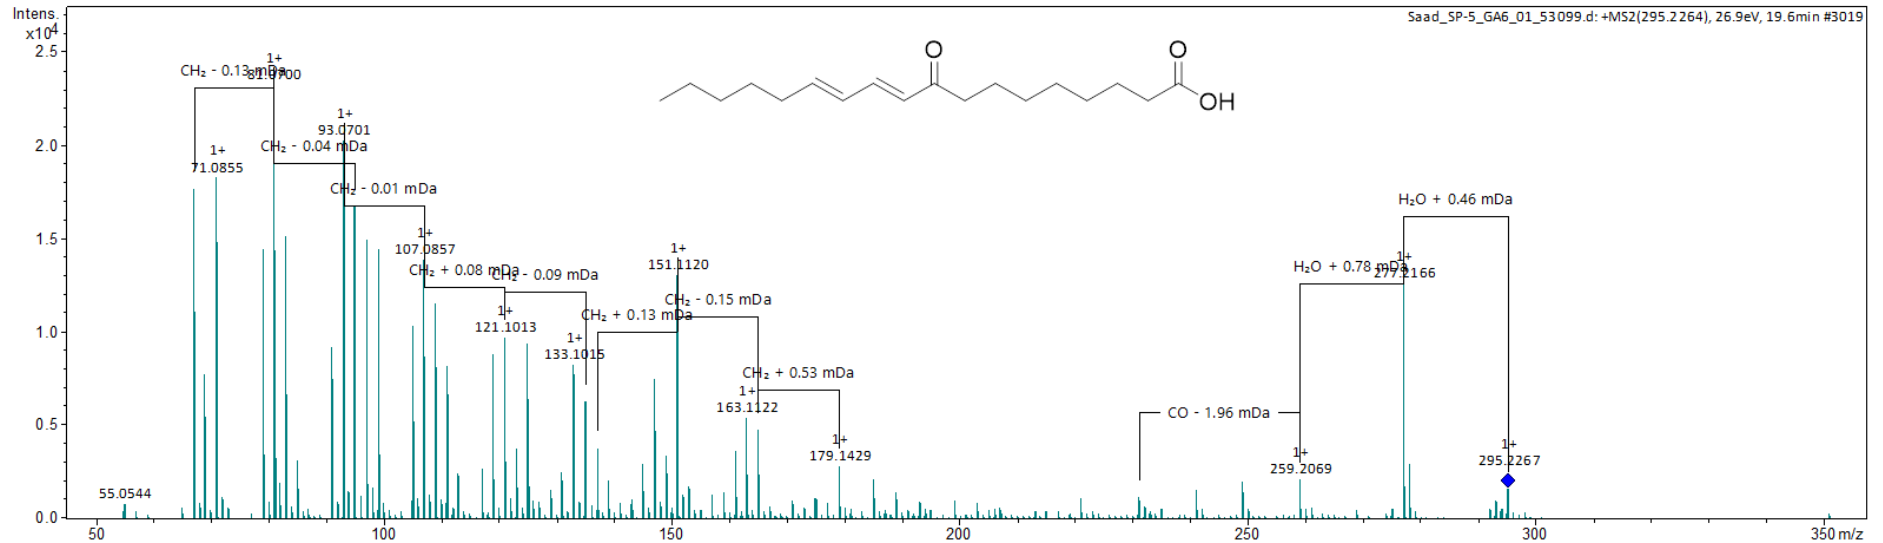

Supp. Fig. S5: MS<sup>2</sup> spectrum of compound 28, dioctanoyl phosphocholine in the positive ionization mode

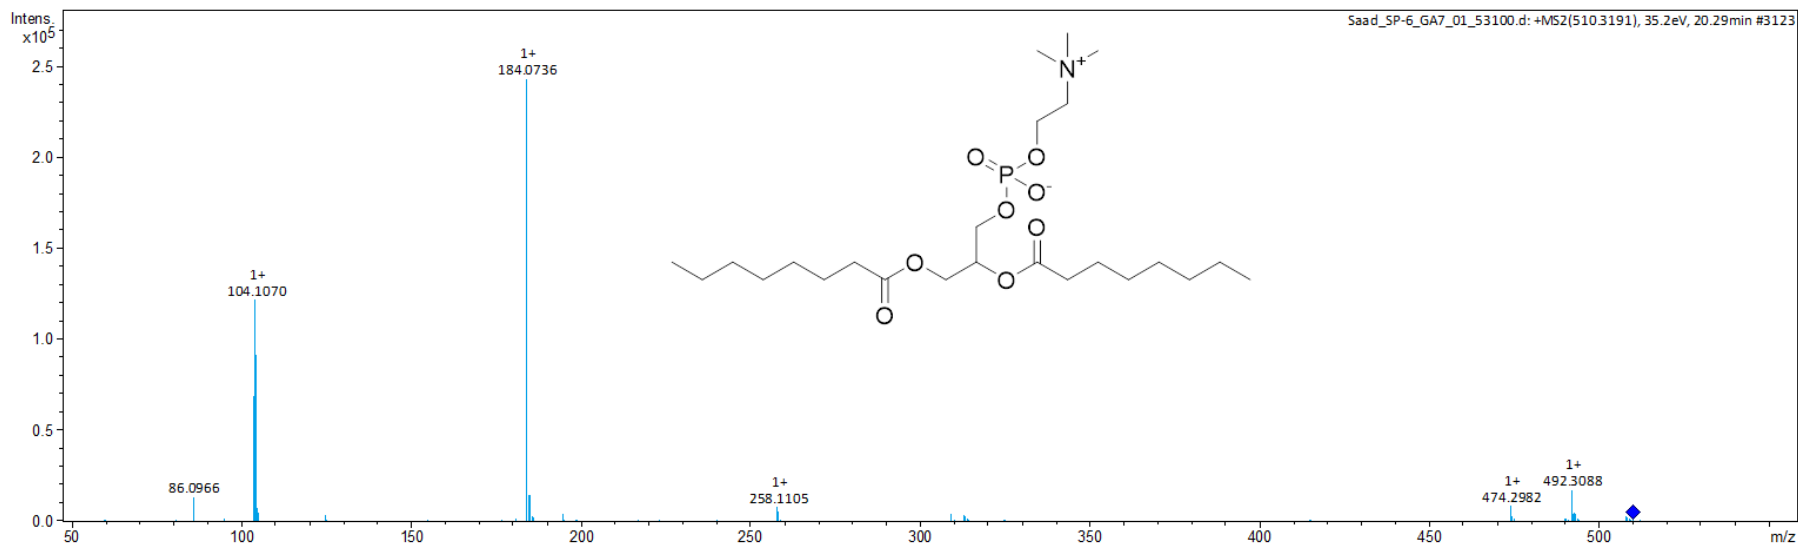

Supp. Fig. S6: MS<sup>2</sup> spectrum of compound 33, of hexadecanoyl-2-(eicosadienoyl)-glycerophosphate in the positive ionization mode

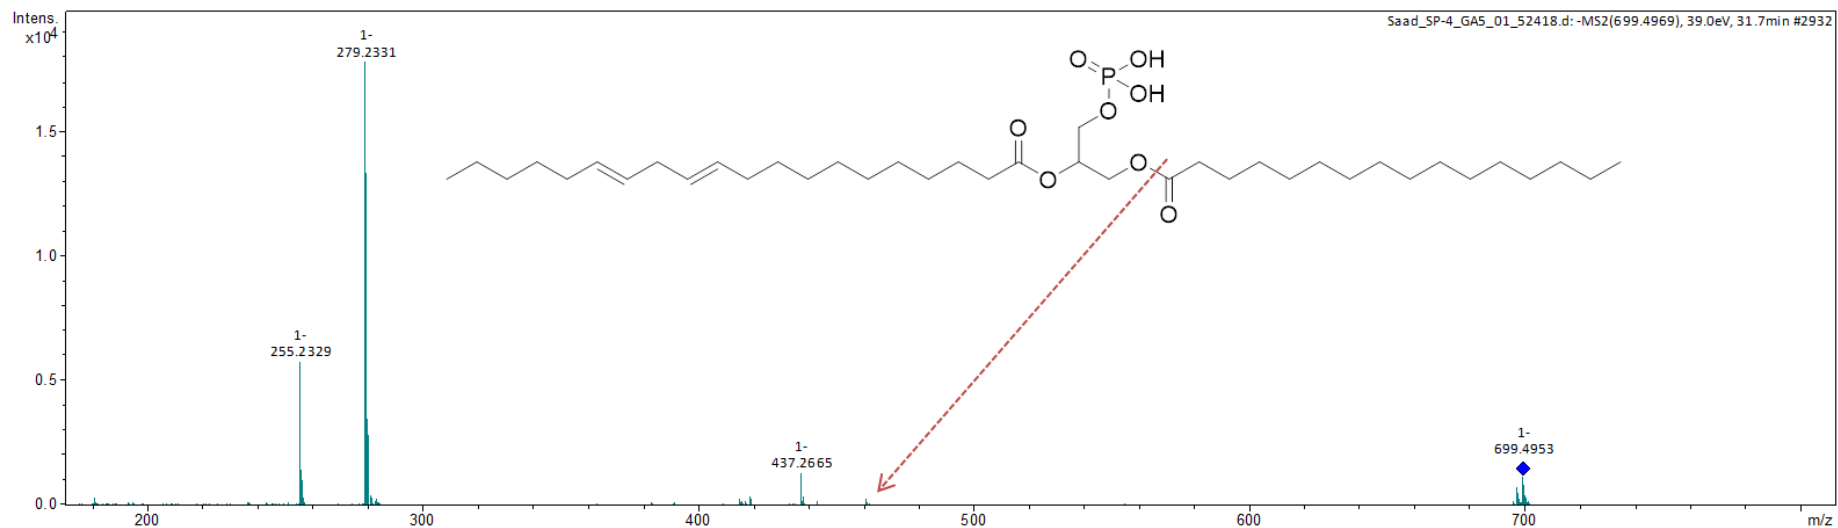

Supp. Fig. S7: MS<sup>2</sup> spectrum of compound 38, of amino octadecenediol in the positive ionization mode

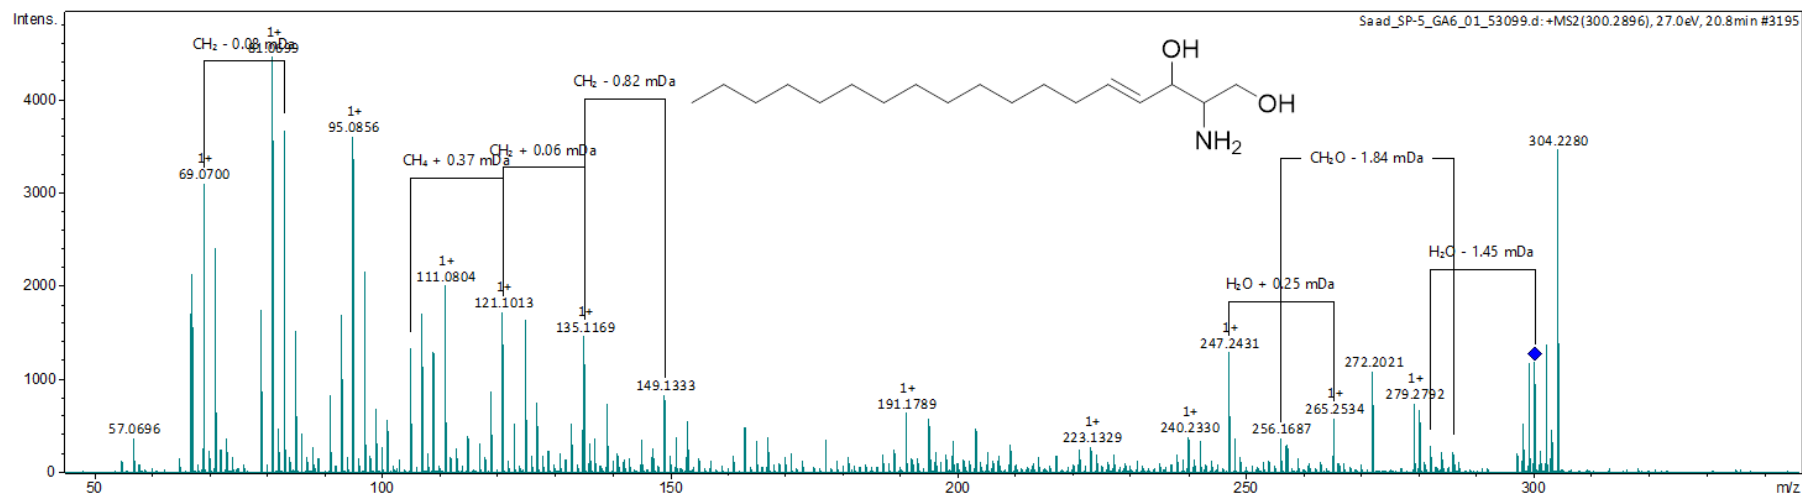

Supp. Fig. S8: MS<sup>2</sup> spectrum of compound 41, of linoleic acid amide in the positive ionization mode

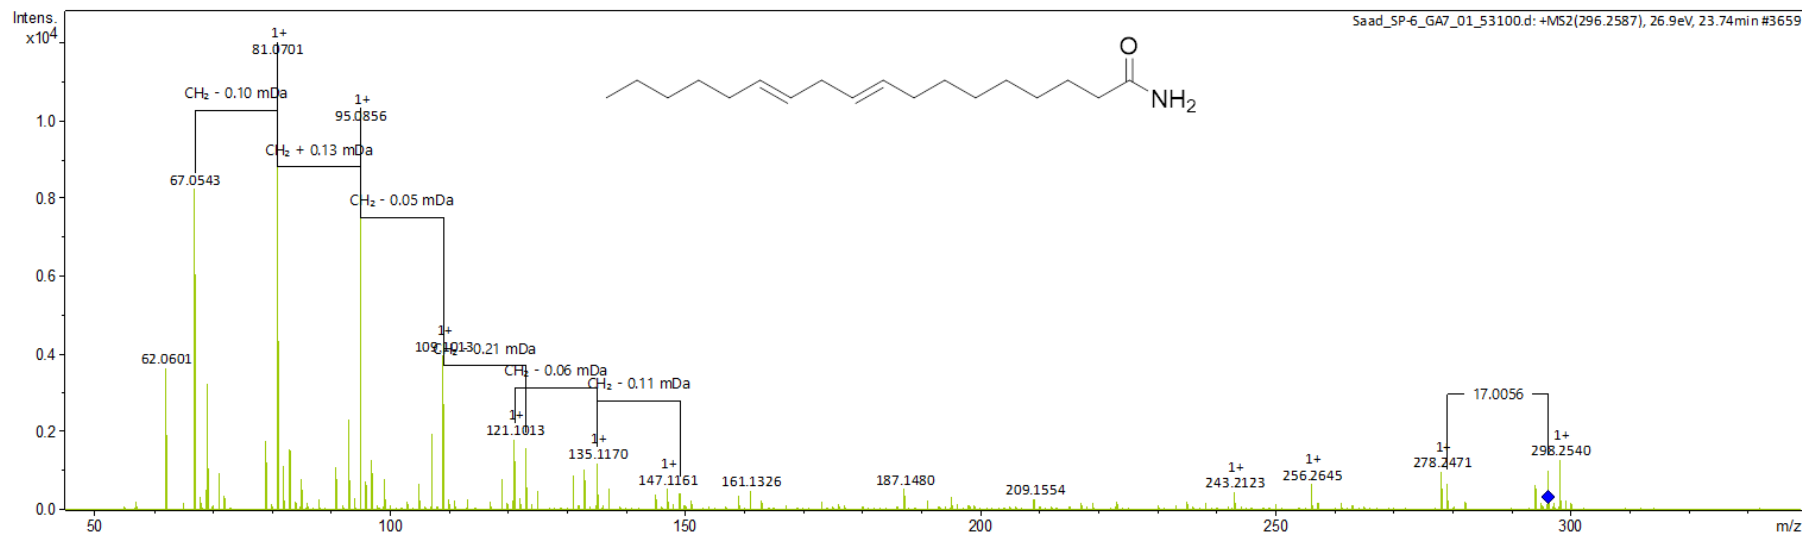

Supp. Fig. S9: MS<sup>2</sup> spectrum of compound 42, of *N*-palmitoyl-L-arginine in the positive ionization mode

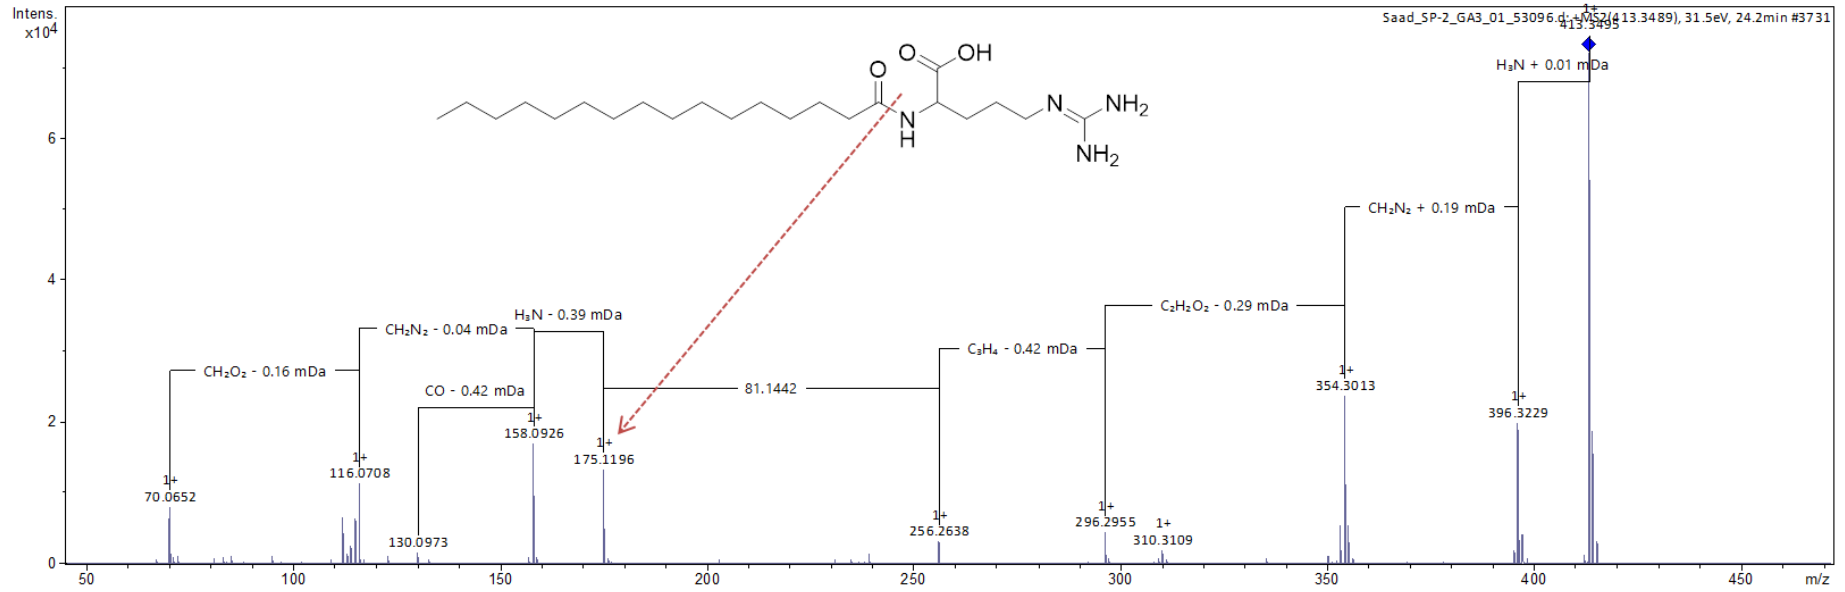

Supp. Fig. S10: MS<sup>2</sup> spectrum of compound 52, of Hexadecanoic acid-*O*-dihexosyl glycerol in the positive ionization mode

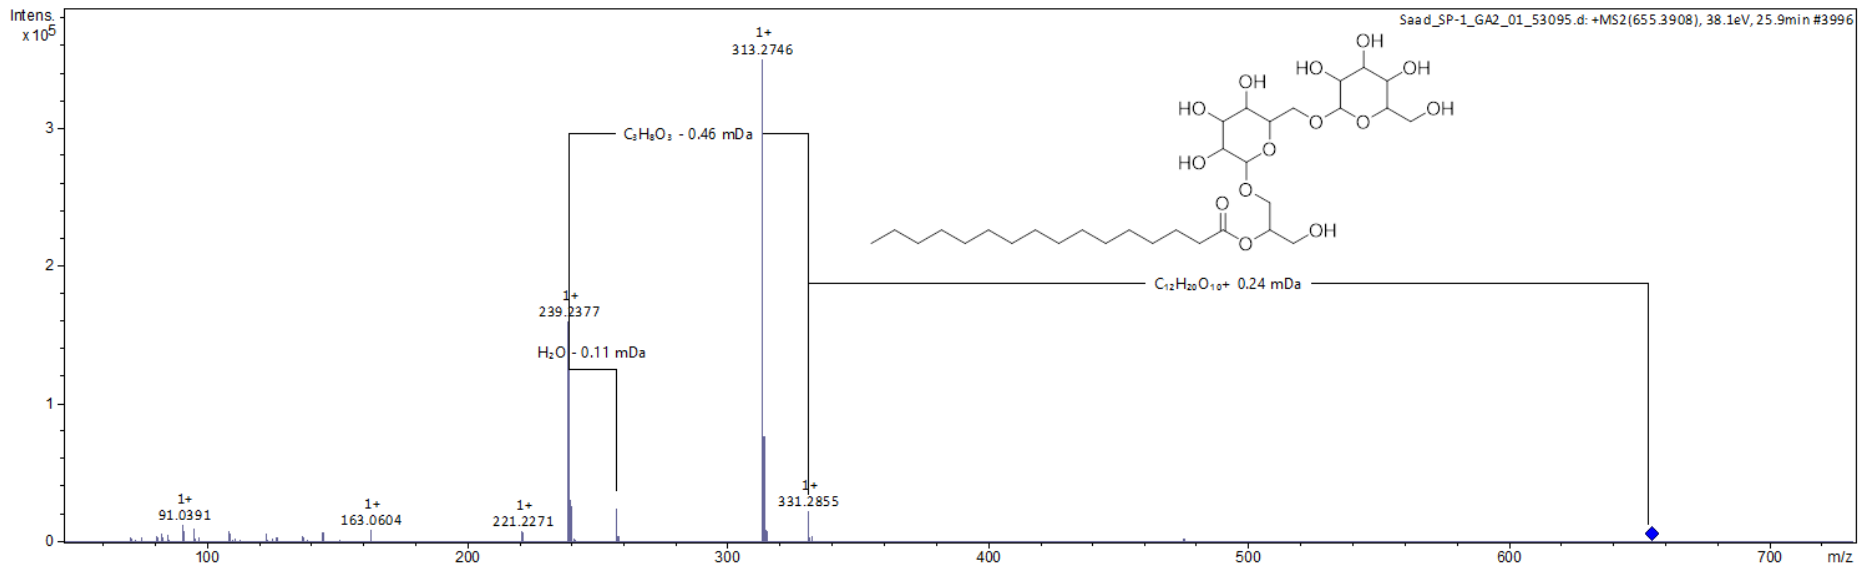



Supp. Fig. S11: MS<sup>2</sup> spectrum of compound 58, of *O*-palmitoyl-*O*-hexosylglycerol in the positive ionization mode

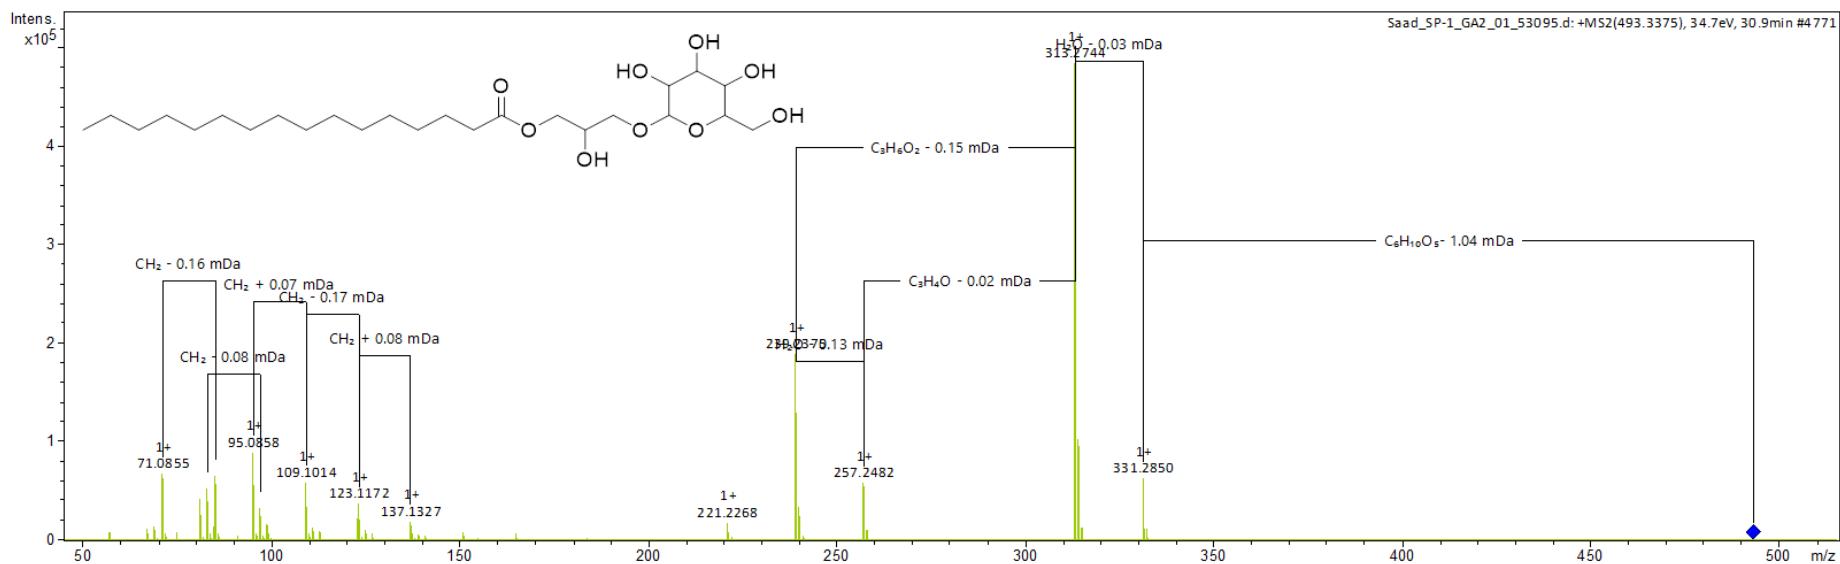

Supp. Fig. S12: MS<sup>2</sup> spectrum of compound 62, of *O*-palmitoylglycerol in the positive ionization mode

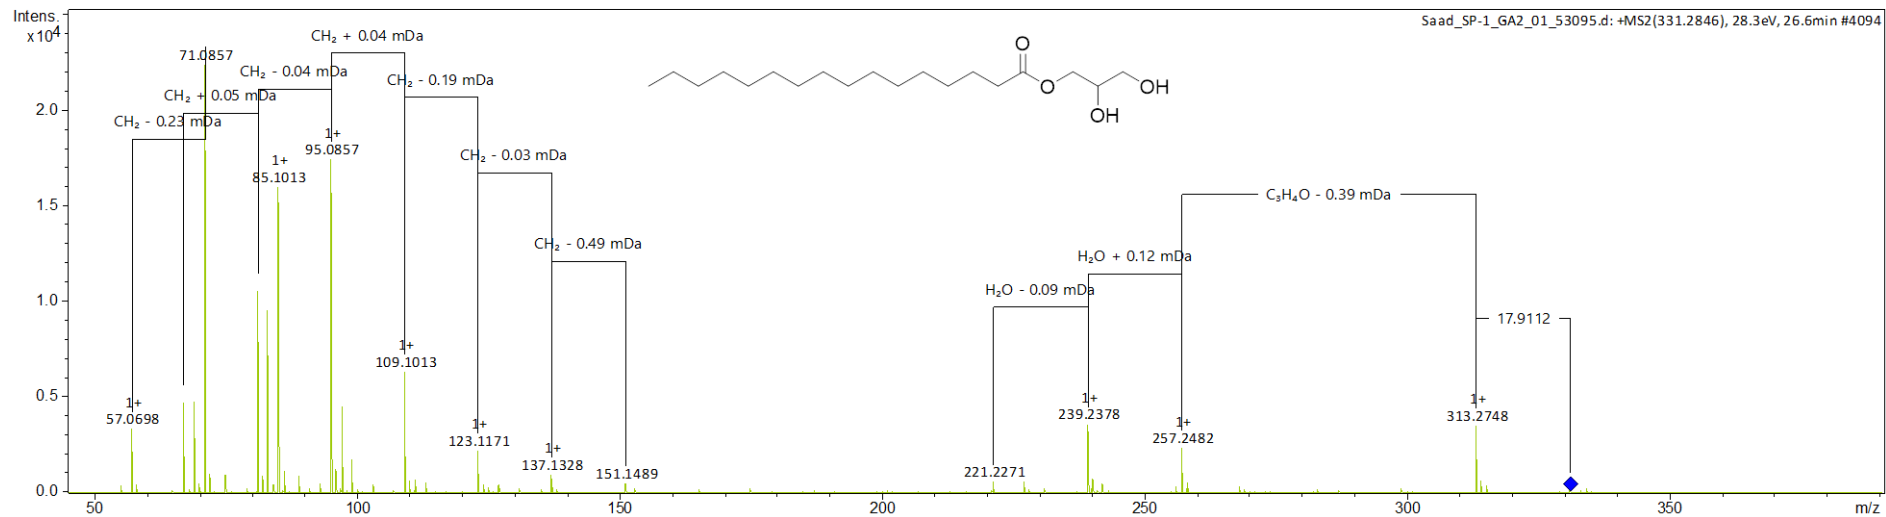

Supp. Fig. S13: MS<sup>2</sup> spectrum of compound 87, of *O*-palmitoyl-*O*-(sulfo-hexosyl) glycerol in the negative ionization mode

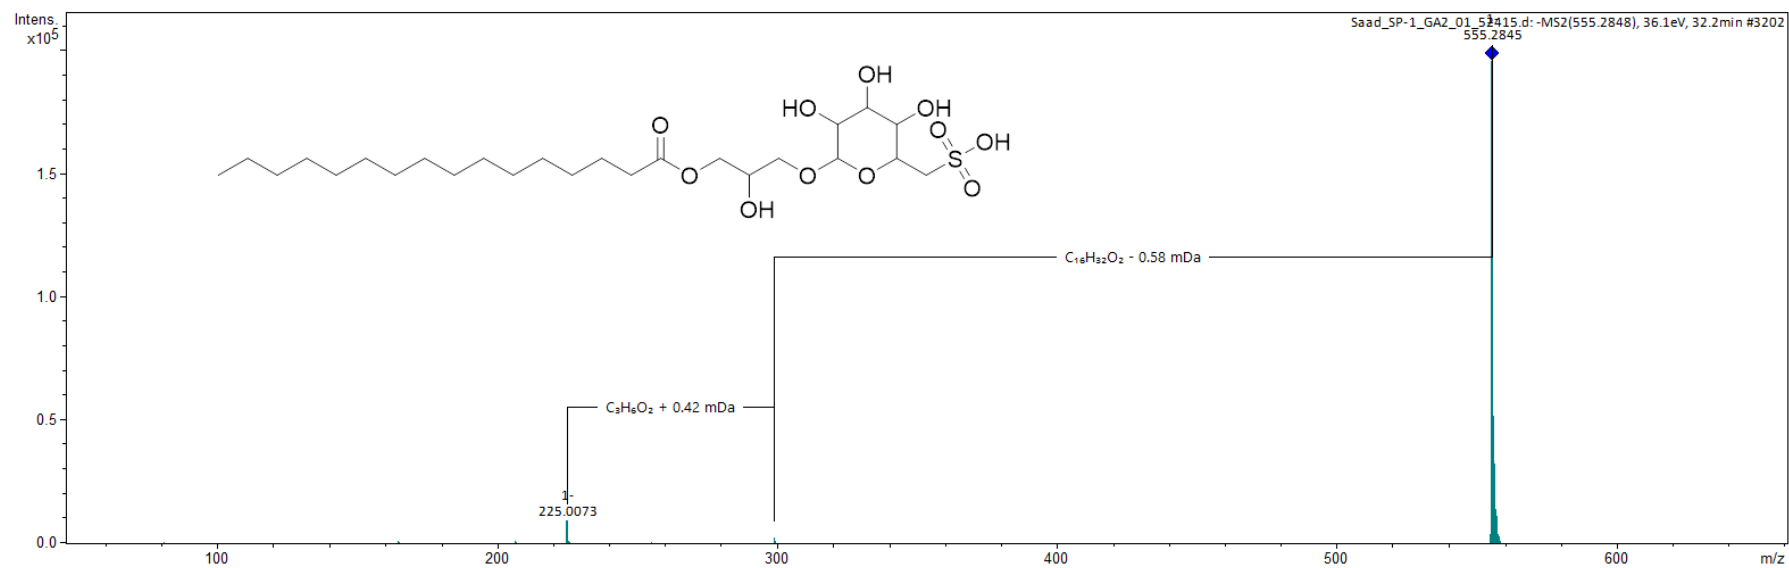

Supp. Fig. S14: UV and MS<sup>2</sup> spectra of compound 69, of 10-Ethenyl-5-ethyl-1,15,16,18-tetrahydro-18-hydroxy-18-(methoxycarbonyl)-6,11,15,22-tetramethyl-20-oxo-20H-9,12-imino-2,21-metheno-7,4:14,17-dinitrilopyrano[4,3-b]azacyclononadecine-16-propanoic acid in the positive ionization mode

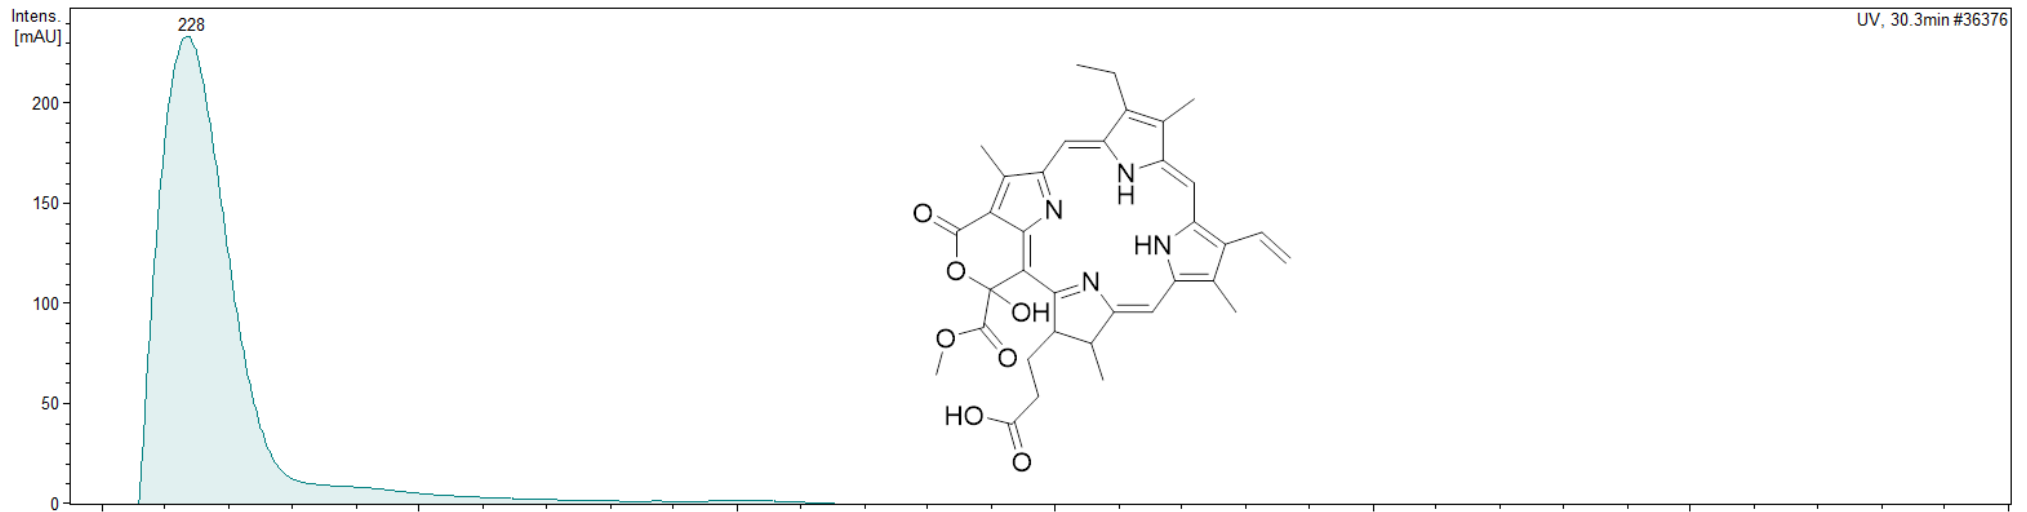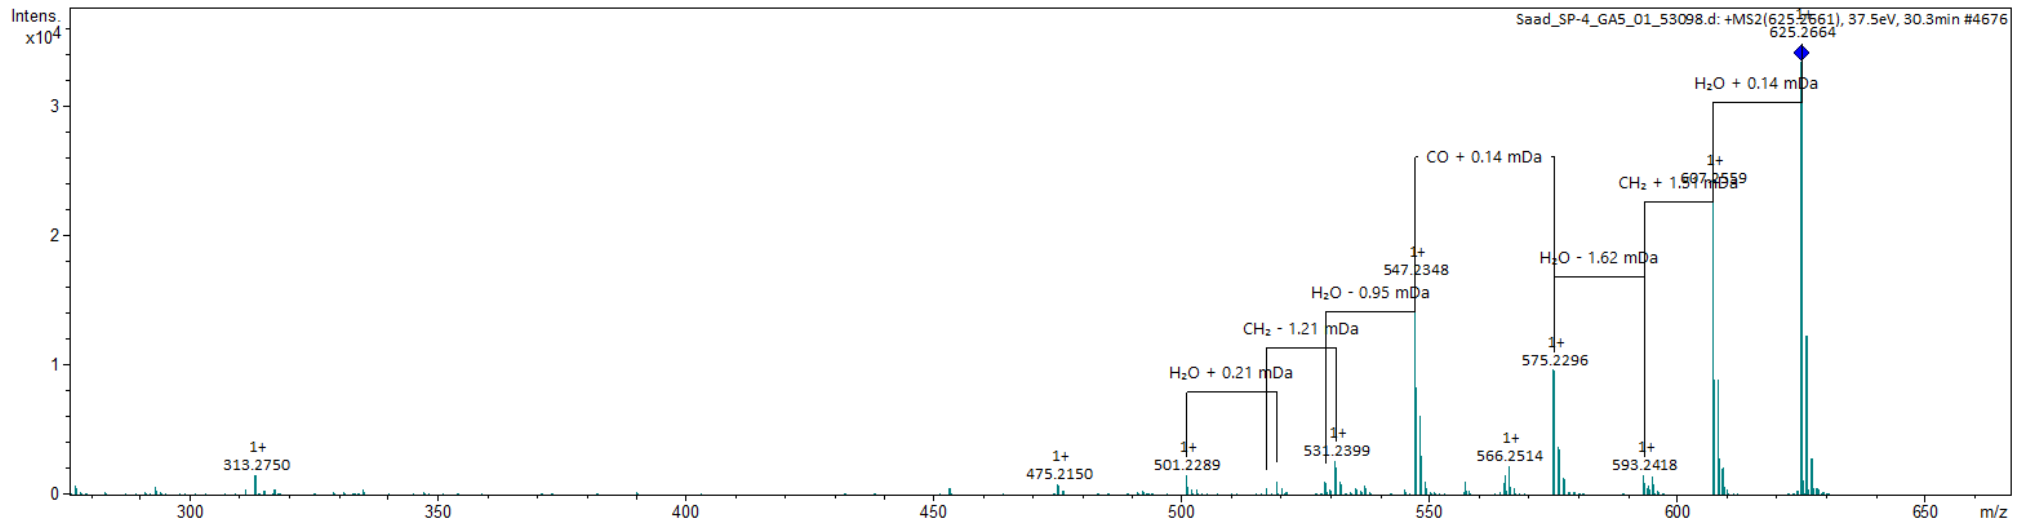

Supp. Fig. S15: UV and MS<sup>2</sup> spectra of compound 76, of harderoporphyrin isomer I in the positive ionization mode

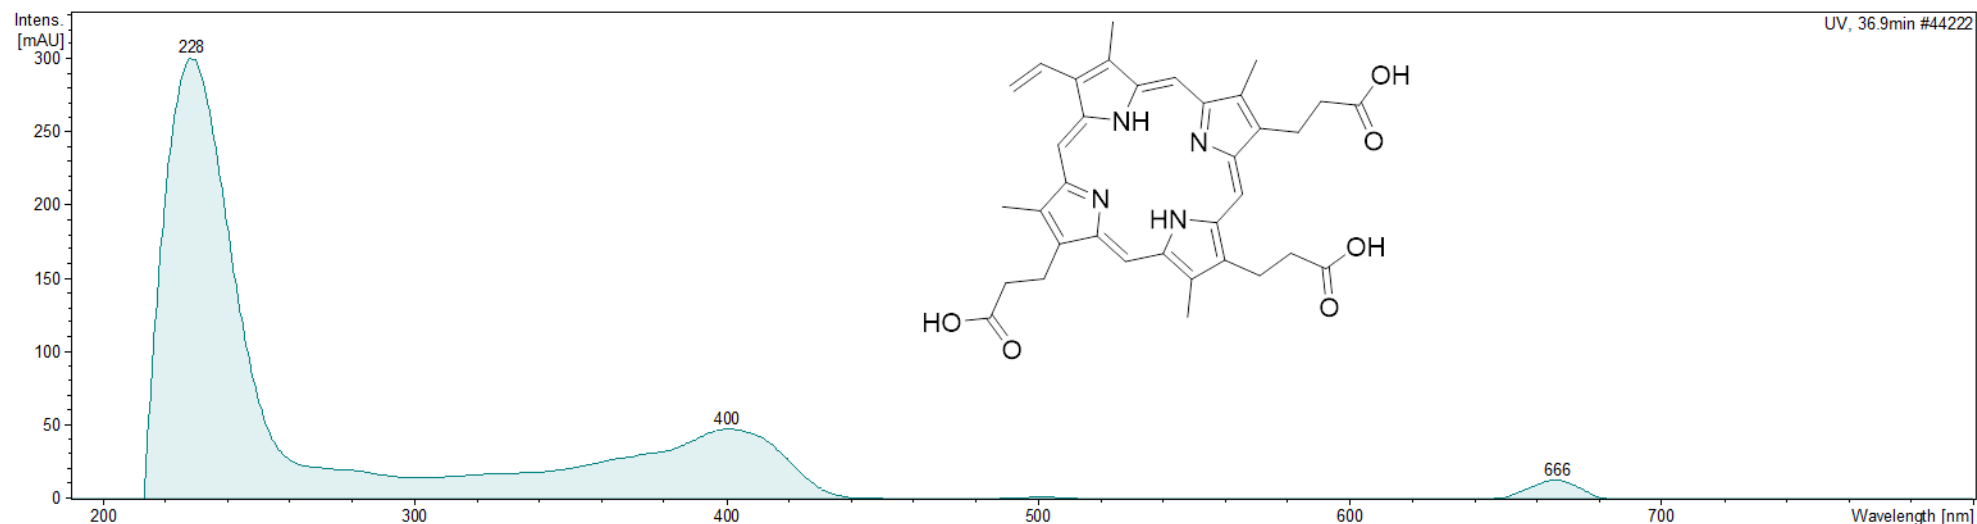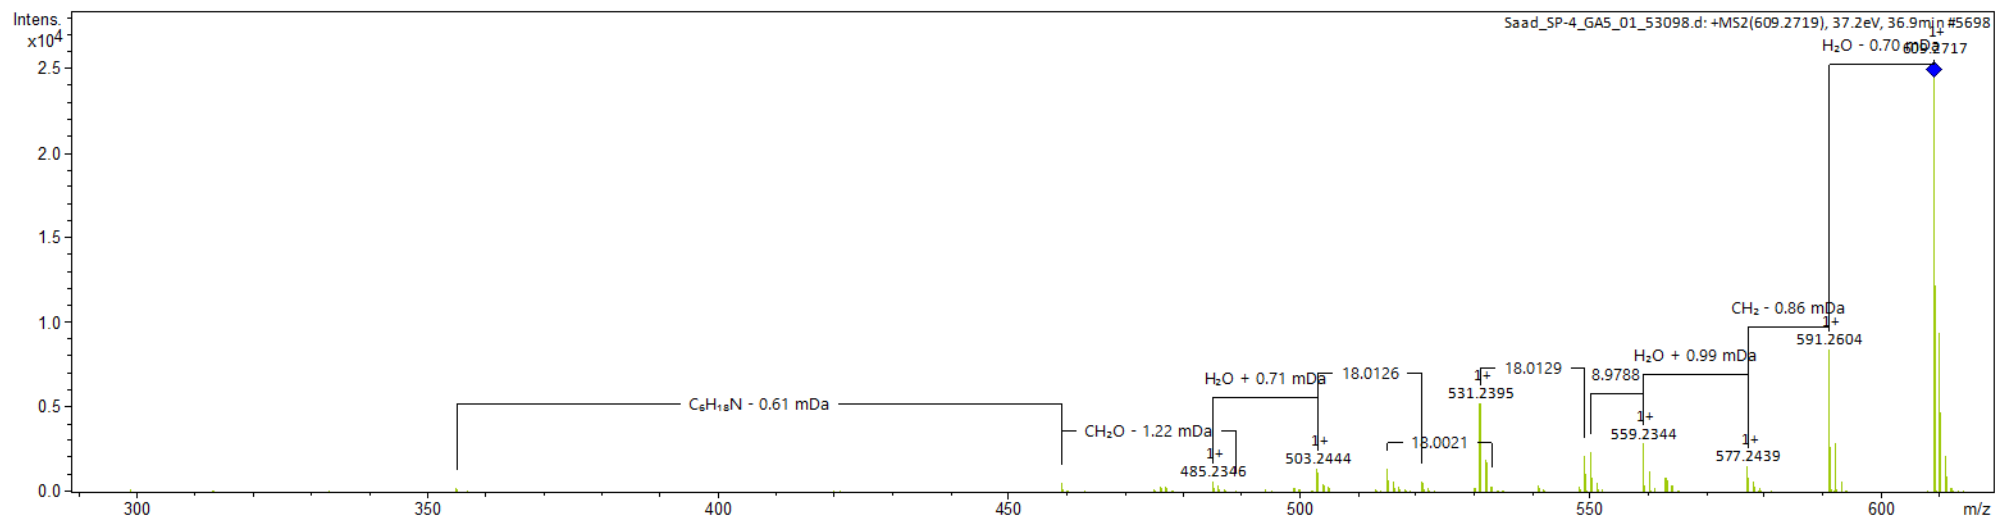

**Fig. S16** OPLS score plot derived from GC/MS dataset modelling of *Spirulina* (S1, S3 & S4), *Amphora* (Am.), *Chlorella* (Chl.) samples against one another (A). The S-plot (B) shows the covariance  $p[1]$  against the correlation  $p(\text{cor})[1]$  of the variables of the discriminating component of the OPLS-DA model. Cut-off values of  $P < 0.05$  were used; selected variables are highlighted in the S-plot with identifications are discussed in text.

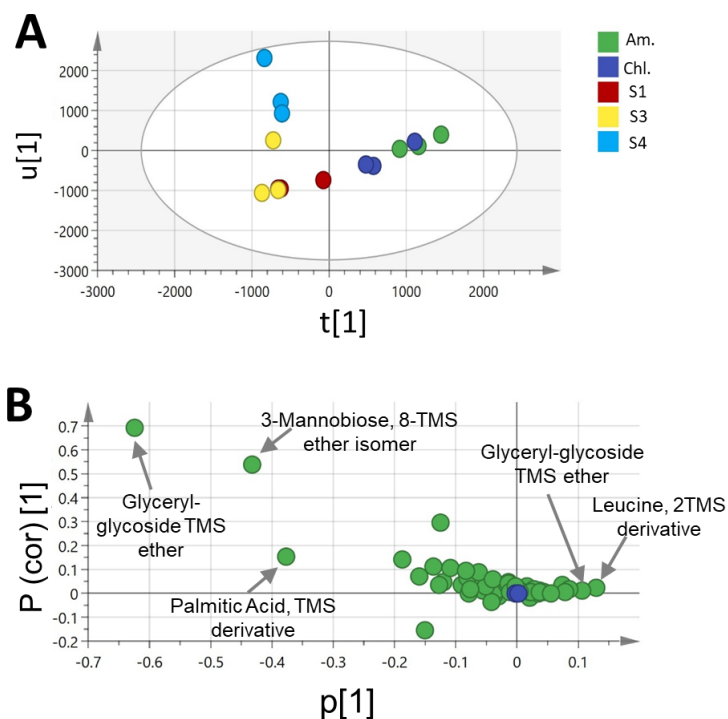

**Fig. S17** OPLS-DA model optimization and validation parameters for modeling *Spirulina* (S3 & S4) samples against *Amphora* (Am.) samples based on GC/MS derived dataset. **A.** The diagnostic metrics R2Y and Q2 as function of number of principal components. **B.** Root mean square error of cross validation results using 7-fold cross validation method as function of number of principal components. **C.** Permutation test, n = 200 that showed negative Q2 intercept value. **D.** The receiver operating characteristic (ROC) curve to assess the classification ability of the developed OPLS-DA showing AUC = 1. **E.** CV-ANOVA to assess for model statistical significance.

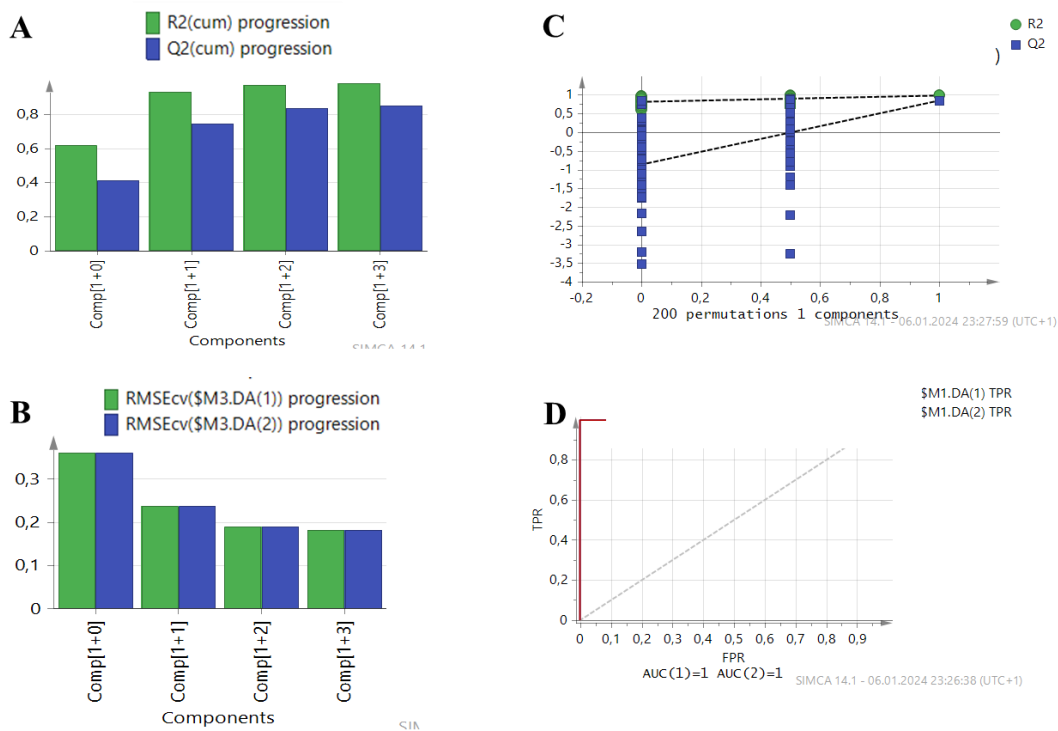

**E**

| M1(Untitled) | SS      | DF | MS       | F       | p        | SD       |
|--------------|---------|----|----------|---------|----------|----------|
| Total corr.  | 8       | 8  | 1        |         |          | 1        |
| Regression   | 6.80449 | 6  | 1.13408  | 1.89723 | 0.384659 | 1.06493  |
| Residual     | 1.19551 | 2  | 0.597757 |         |          | 0.773147 |

**Fig. S18** OPLS-DA model optimization and validation parameters for modeling *Spirulina* (S3 & S4) samples against *Chlorella* (Chl.) samples based on GC/MS derived dataset. **A.** The diagnostic metrics R2Y and Q2 as function of number of principal components. **B.** Root mean square error of cross validation results using 7-fold cross validation method as function of number of principal components. **C.** Permutation test, n = 200 that showed negative Q2 intercept value. **D.** The receiver operating characteristic (ROC) curve to assess the classification ability of the developed OPLS-DA showing AUC = 1. **E.** CV-ANOVA to assess for model statistical significance.

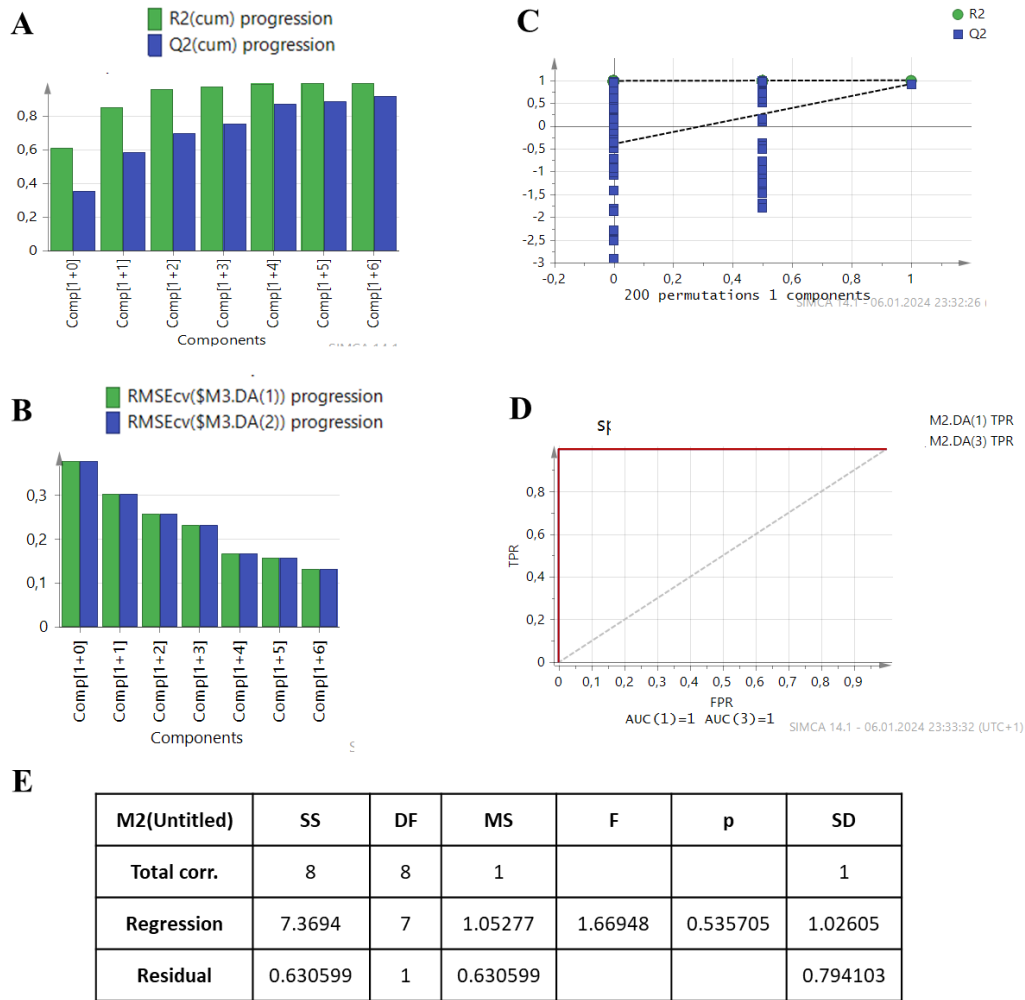

**Fig. S19** UV-Vis spectra of Spirulina, Amphora and Chlorella samples under study

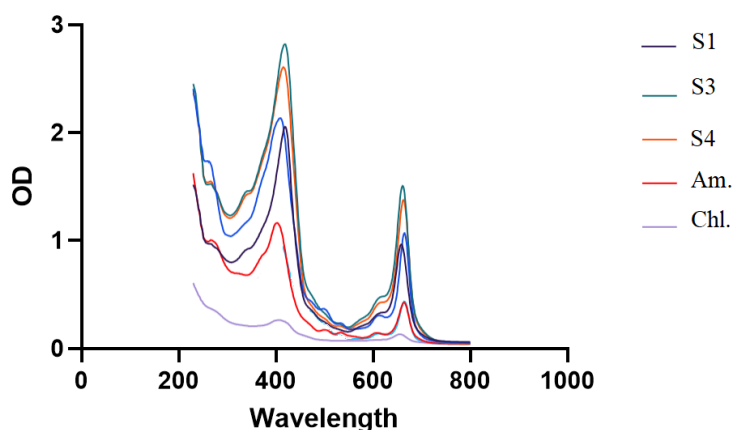

**Fig. S20** Principal component analysis and hierarchical clustering of UV-Vis dataset of Spirulina (S1, S3 & S4), Amphora (Am.) and Chlorella (Chl.). (A) Score plot of PC1 vs. PC2 scores. (B) Loading plot for PC1 & PC2 contributing metabolites and their assignments. The metabolome clusters are located at the distinct positions in two-dimensional space described by two vectors of principal component 1 (PC1) = 98% and PC2 = 1.74%. (C) HCA plot.

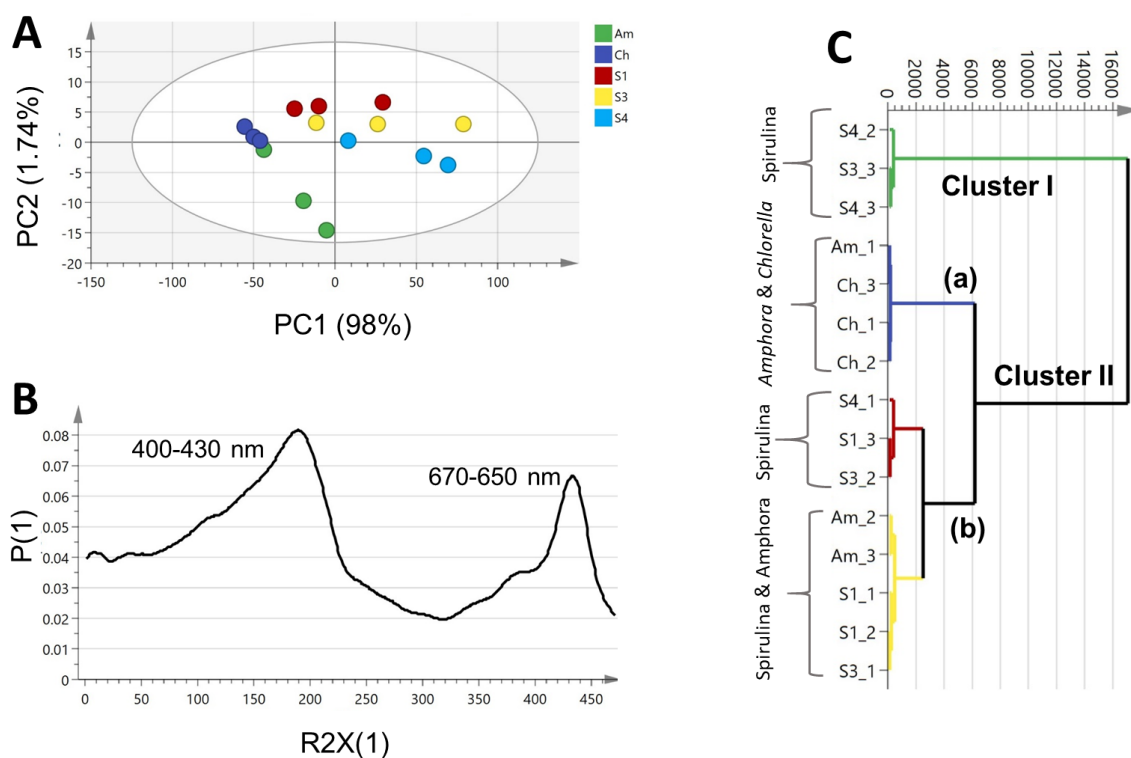



**Fig. S21** OPLS-DA model optimization and validation parameters for modeling *Spirulina* (S3 & S4) samples against *Amphora* (Am.) samples based on UV-Vis derived dataset . **A.** The diagnostic metrics R2Y and Q2 as function of number of principal components. **B.** Root mean square error of cross validation results using 7-fold cross validation method as function of number of principal components. **C.** Permutation test, n = 200 that showed negative Q2 intercept value. **D.** The receiver operating characteristic (ROC) curve to assess the classification ability of the developed OPLS-DA showing AUC = 1. **E.** CV-ANOVA to assess for model statistical significanc.

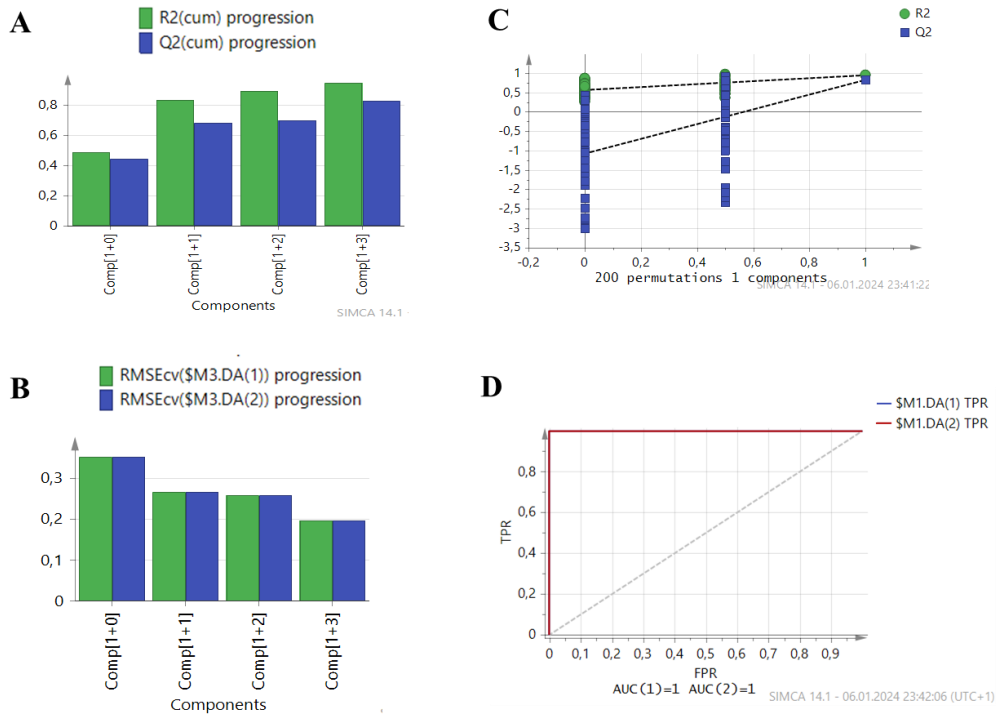

| M1(Untitled) | SS      | DF | MS       | F       | p        | SD       |
|--------------|---------|----|----------|---------|----------|----------|
| Total corr.  | 8       | 8  | 1        |         |          | 1        |
| Regression   | 6.60905 | 6  | 1.10151  | 1.58382 | 0.436172 | 1.04953  |
| Residual     | 1.39095 | 2  | 0.695476 |         |          | 0.833952 |

**Fig. S22** OPLS-DA model optimization and validation parameters for modeling *Spirulina* (S3 & S4) samples against *Chlorella* (Chl.) samples based on UV-Vis derived dataset. **A.** The diagnostic metrics R2Y and Q2 as function of number of principal components. **B.** Root mean square error of cross validation results using 7-fold cross validation method as function of number of principal components. **C.** Permutation test, n = 200 that showed negative Q2 intercept value. **D.** The receiver operating characteristic (ROC) curve to assess the classification ability of the developed OPLS-DA showing AUC = 1. **E.** CV-ANOVA to assess for model statistical significance.

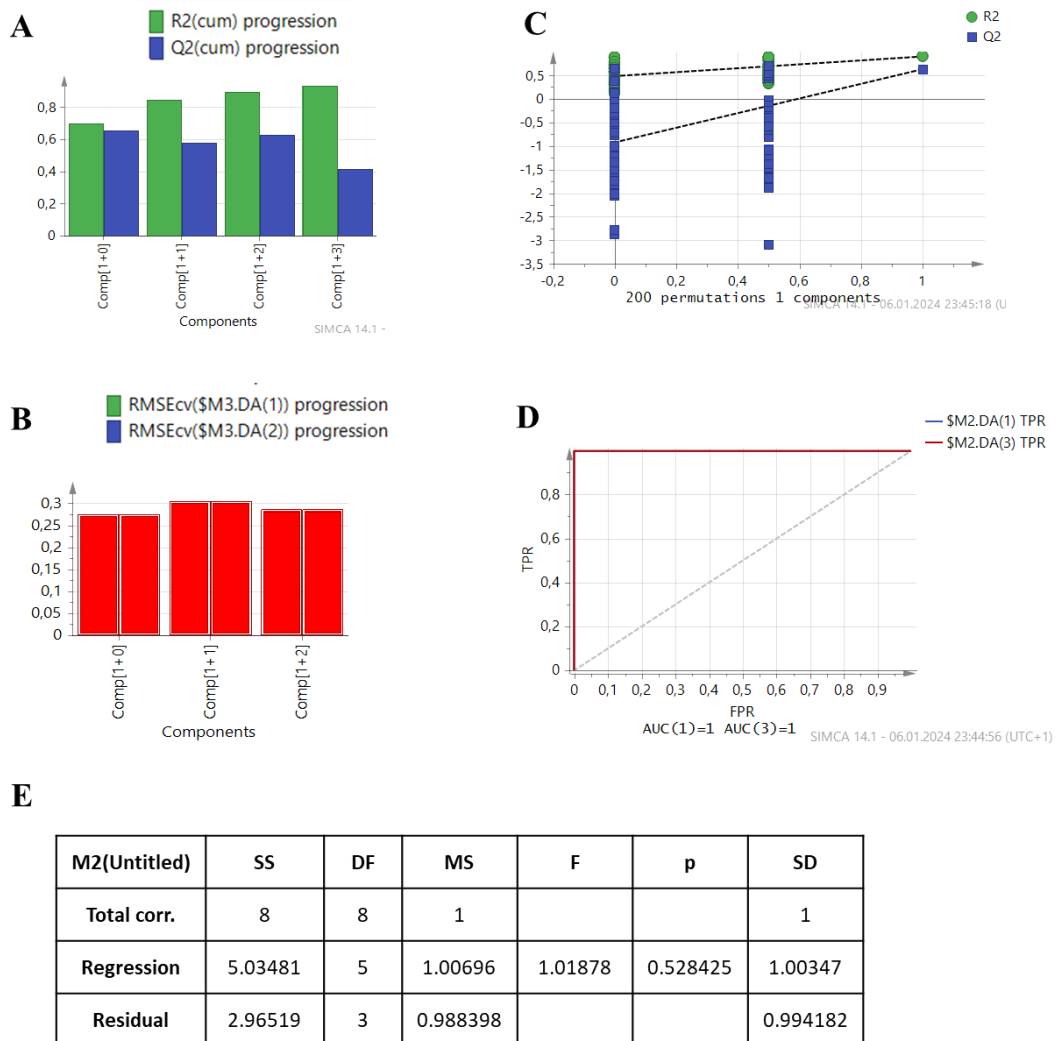

## References

1. Van Anh, N., et al., *Thladiantha seed oils-New source of conjugated fatty acids: characterization of triacylglycerols and fatty acids*. Journal of Oleo Science, 2020. **69**(9): p. 993-1000.
2. Liu, X.-T., et al., *Cholestane glycosides and trihydroxy fatty acids from the rhizomes of Dioscorea septemloba*. 2010. **76**(03): p. 291-294.
3. Kim, C.S., et al., *Five new oxylipins from Chaenomeles sinensis*. 2014. **49**(11): p. 1151-1159.
4. Hamburger, M., et al., *Plant anticancer agents, XLIII.(E, E)-7, 12-dioxo-octadeca-8, 10-dien-1-oic acid (ostopanic acid), a cytotoxic fatty acid from Ostodes paniculata*. 1987. **50**(2): p. 281-283.
5. DellaGreca, M., et al., *Isolation and Phytotoxicity of Apocarotenoids from Chenopodium a lbum*. 2004. **67**(9): p. 1492-1495.
6. Hegazi, N.M., et al., *Molecular networking leveraging the secondary metabolomes space of Halophila stipulaceae (Forsk.) Aschers. and Thalassia hemprichii (Ehrenb. ex Solms) Asch. in tandem with their chemosystematics and antidiabetic potentials*. 2021. **19**(5): p. 279.
7. Jin, Y., et al., *Comprehensive characterization of the chemical composition of Lurong dabu decoction and its absorbed prototypes and metabolites in rat plasma using UHPLC–Q Exactive Orbitrap–HRMS*. Food Research International, 2022. **161**: p. 111852.
8. Bertin, M.J., et al., *Identification of toxic fatty acid amides isolated from the harmful alga Prymnesium parvum carter*. Harmful algae, 2012. **20**: p. 111-116.
9. Ballesteros-Torres, J.M., et al., *Amino acids and acylcarnitine production by Chlorella vulgaris and Chlorella sorokiniana microalgae from wastewater culture*. PeerJ, 2019. **7**: p. e7977.
10. Vigor, C., et al., *Isoprostanooids quantitative profiling of marine red and brown macroalgae*. Food chemistry, 2018. **268**: p. 452-462.
11. Heiss, E.H., et al., *Identification of chromomoric acid Cl as an Nrf2 activator in Chromolaena odorata*. Journal of natural products, 2014. **77**(3): p. 503-508.
12. Řezanka, T. and I.A. Guschina, *Glycoside esters from lichens of central Asia*. Phytochemistry, 2001. **58**(3): p. 509-516.
13. Luo, G., et al., *UHPLC-Q-Orbitrap-MS-Based Metabolomics Reveals Chemical Variations of Two Types of Rhizomes of Polygonatum sibiricum*. 2022. **27**(15): p. 4685.
14. Rho, M.-C., et al., *A novel monogalactosylacylglycerol with inhibitory effect on platelet aggregation from the cyanophyceae Oscillatoria rosea*. Journal of natural products, 1996. **59**(3): p. 308-309.
15. Qiu, S., et al., *Chemometrics-assisted identification of anti-inflammatory compounds from the green alga Klebsormidium flaccidum var. Zivo*. Molecules, 2020. **25**(5): p. 1048.
16. Le Bris, S., M.-R. Plante-Cuny, and E. Vacelet, *Characterisation of bacterial and algal pigments and breakdown products by HPLC in mixed freshwater planktonic populations*. Archiv für Hydrobiologie, 1998: p. 409-434.
17. Tang, Y., et al., *Comparative metabolomics analysis of Elodea nuttallii and Cladophora sp. in aquaculture systems*. Aquaculture, 2023. **563**: p. 738950.
18. Cheng, H.-H., et al., *Cytotoxic pheophorbide-related compounds from Clerodendrum c alamitosum and C. cyrtophyllum*. Journal of natural products, 2001. **64**(7): p. 915-919.
19. Sommella, E., et al., *Fast profiling of natural pigments in different spirulina (arthrospira platensis) dietary supplements by DI-FT-ICR and evaluation of their antioxidant potential by pre-column DPPH-UHPLC assay*. Molecules, 2018. **23**(5): p. 1152.
20. Li, J., et al., *Lipid metabolic characteristics and marker compounds of ripened Pu-erh tea during pile fermentation revealed by LC-MS-based lipidomics*. Food Chemistry, 2023. **404**: p. 134665.
21. Hirao, S., et al., *Algicidal activity of glycerolipids from brown alga Ishige sinicola toward red tide microalgae*. 2012: p. 1201312780-1201312780.
